# Supplementary material for: Genomic data provide new insights on the demographic history and the extent of recent material transfers in Norway spruce
Source: PubMed Central journal article supplement (PMC6708423; doi:10.1111/eva.12801), 2019-04-30

**Observed**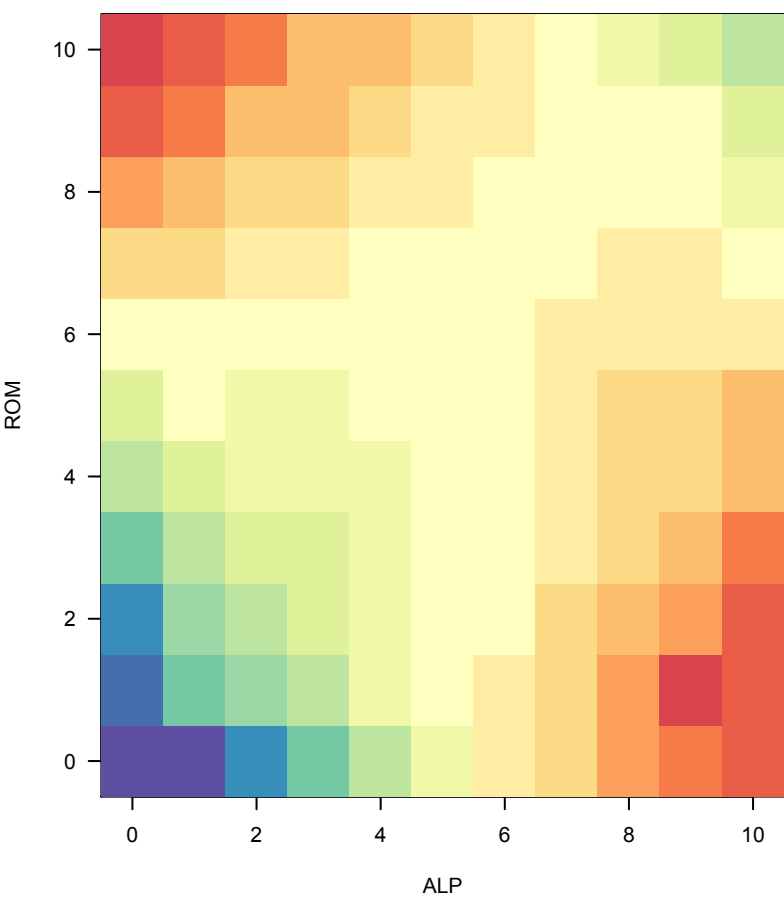**Model**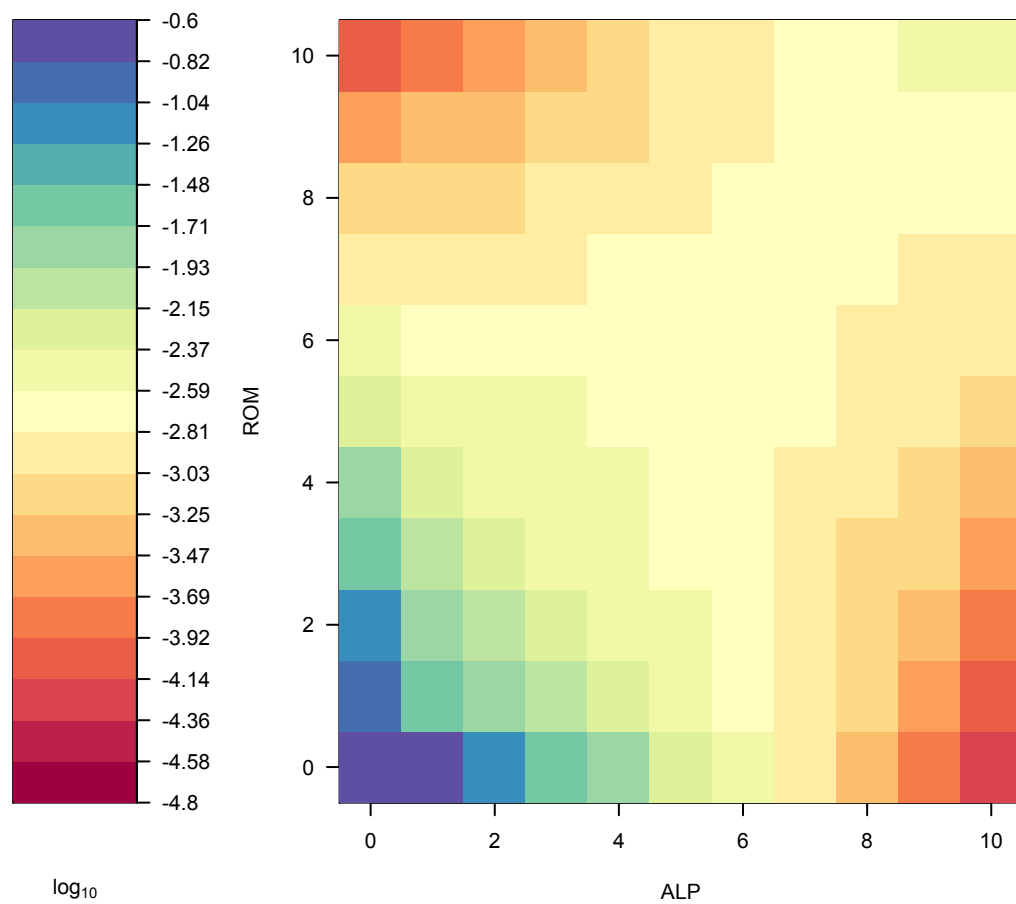**Residual**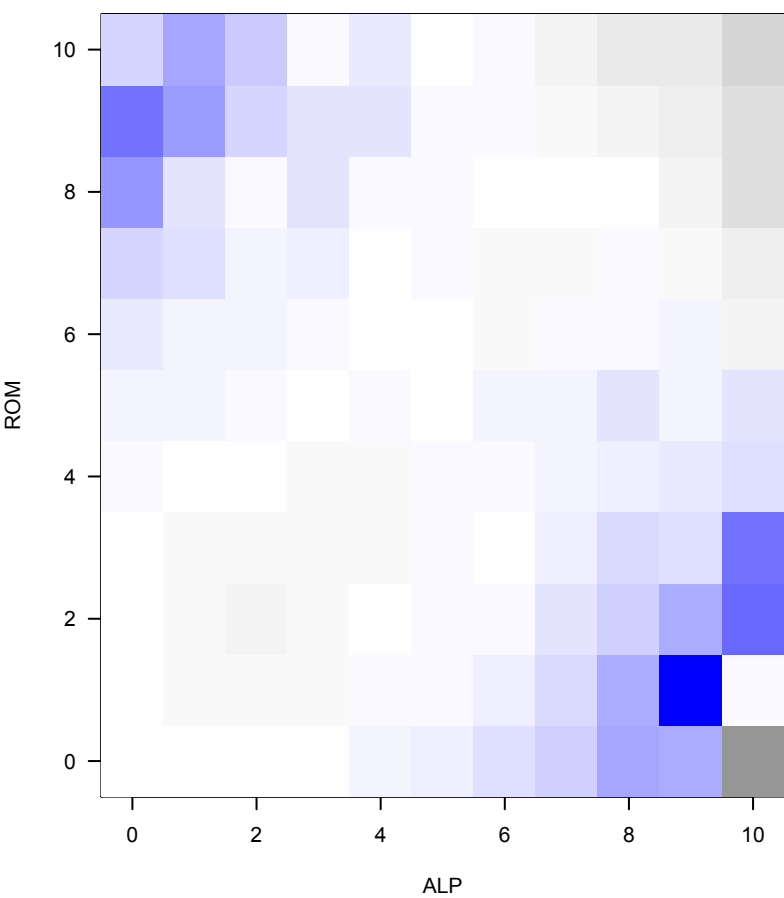**Marginal SFS**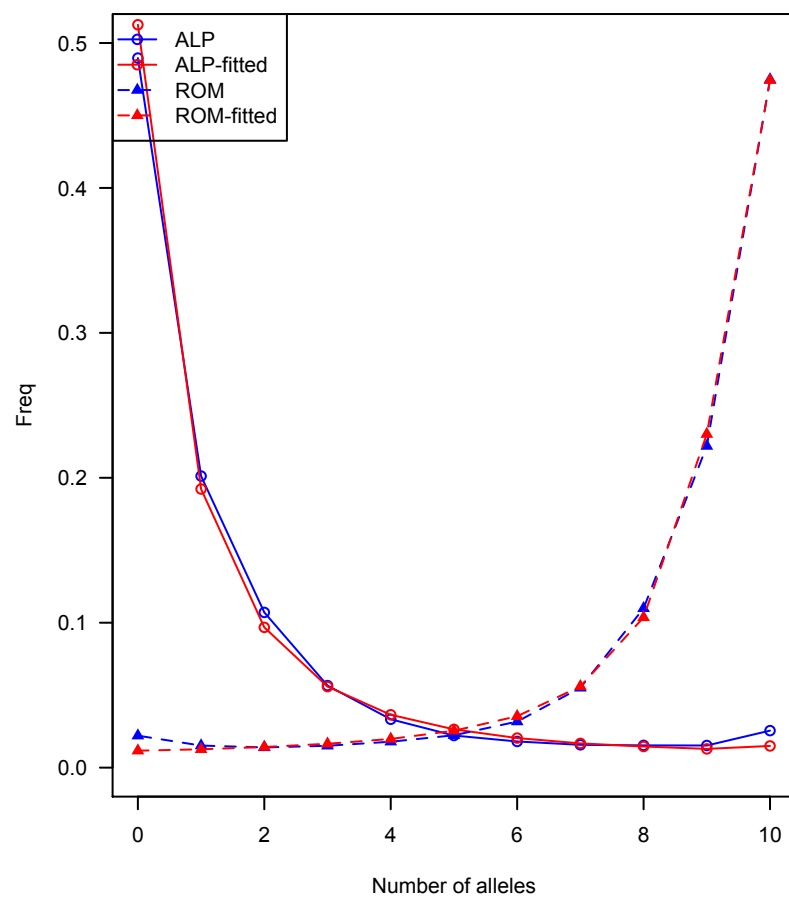

**Observed**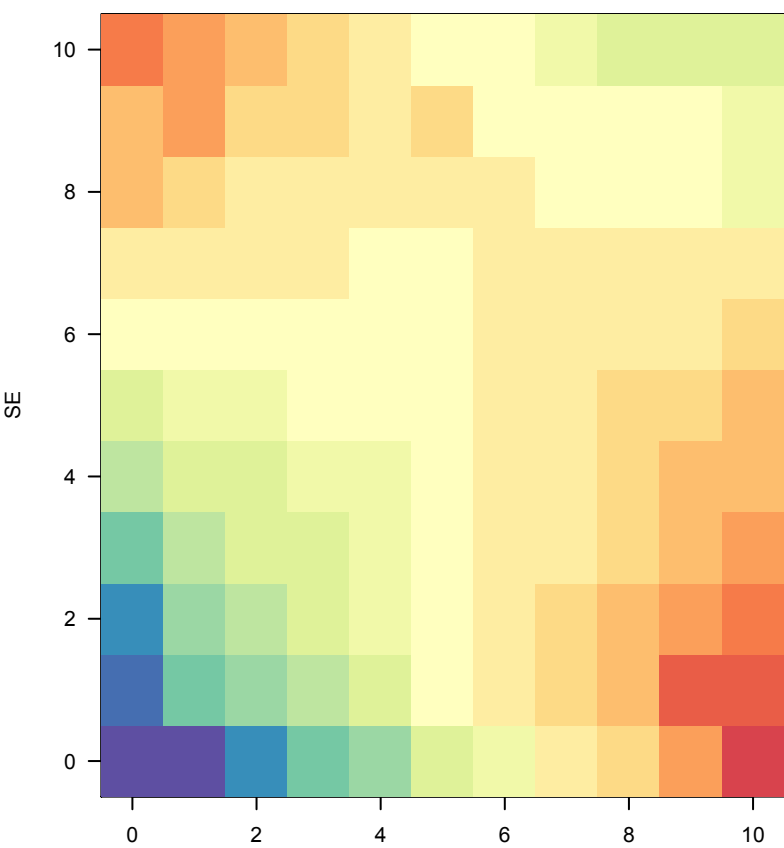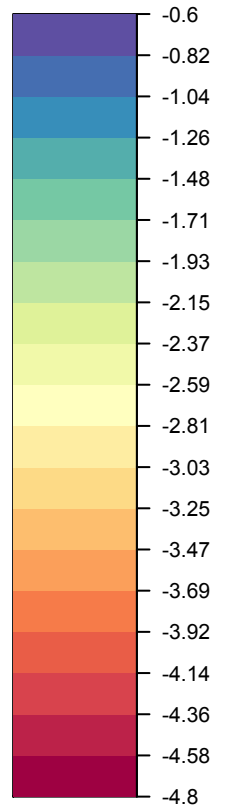 $\log_{10}$ **Model**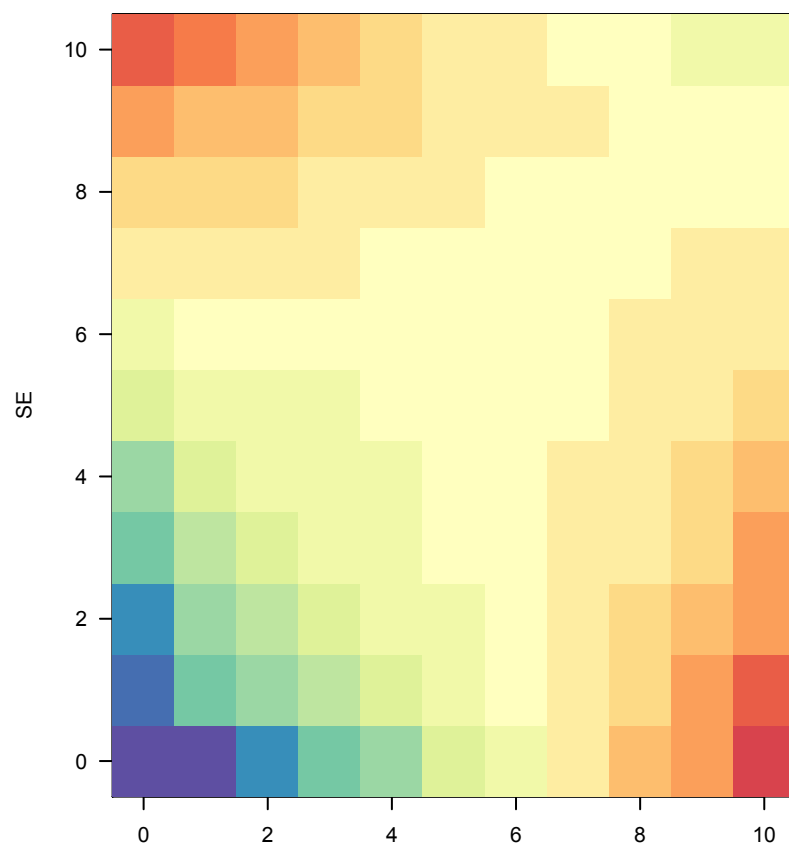 $\log_{10}$ **Residual**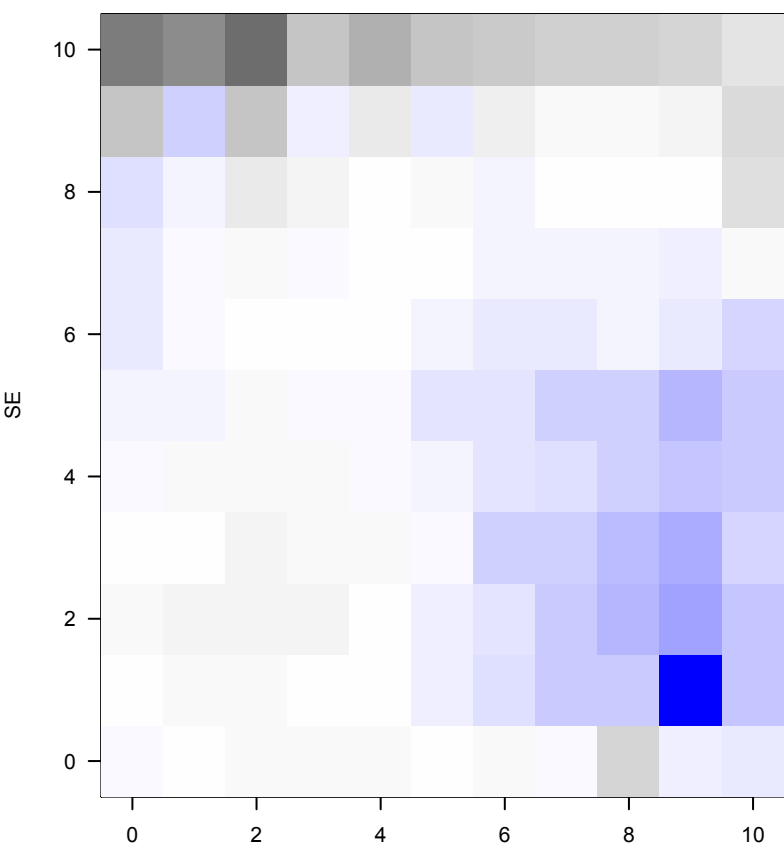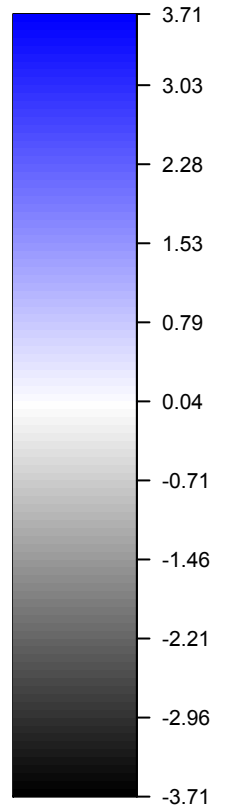**Marginal SFS**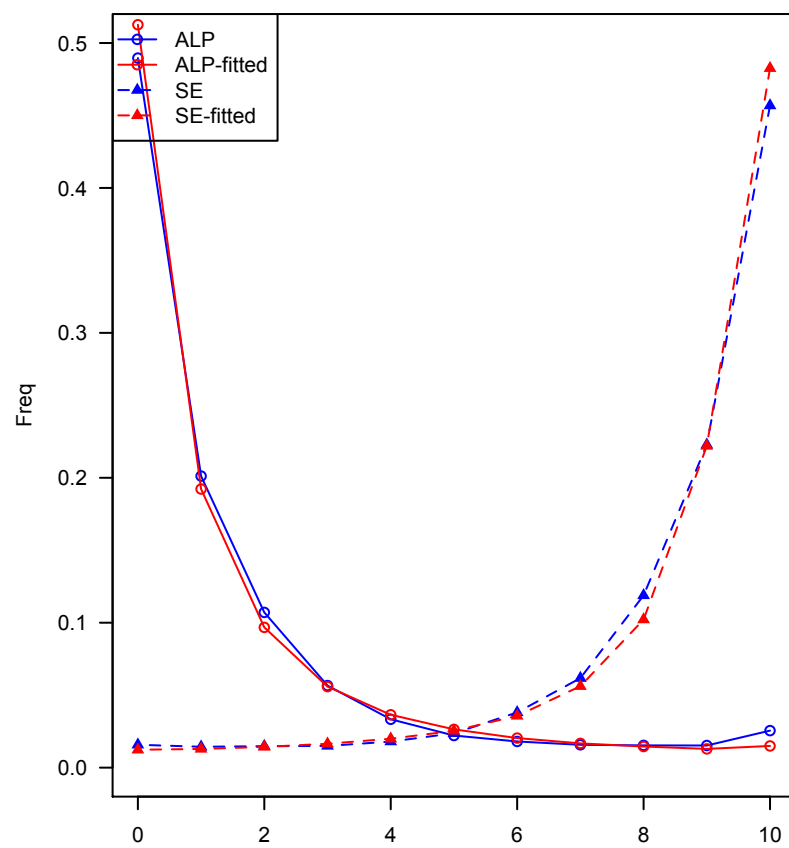

**Observed**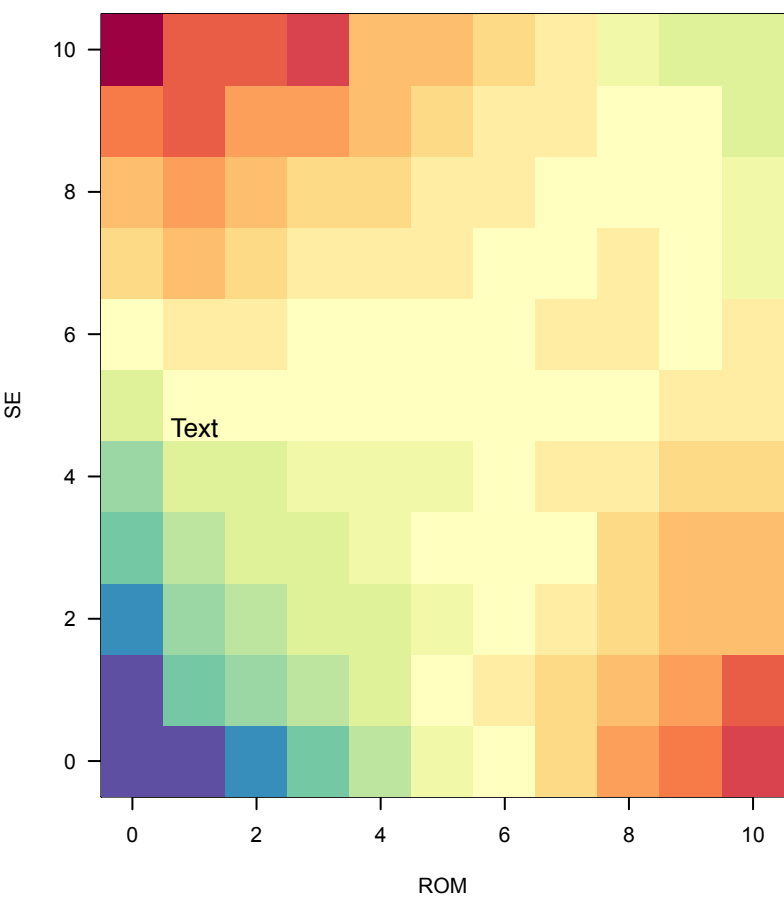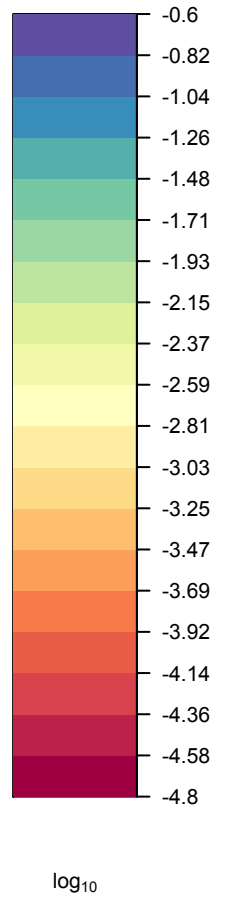**Model**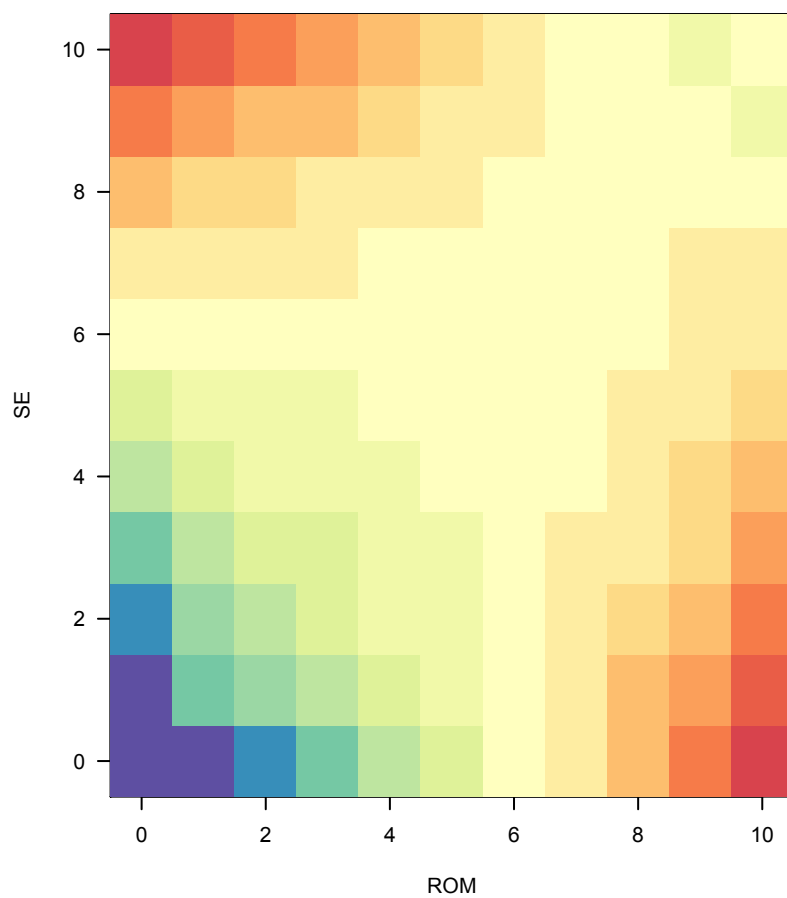**Residual**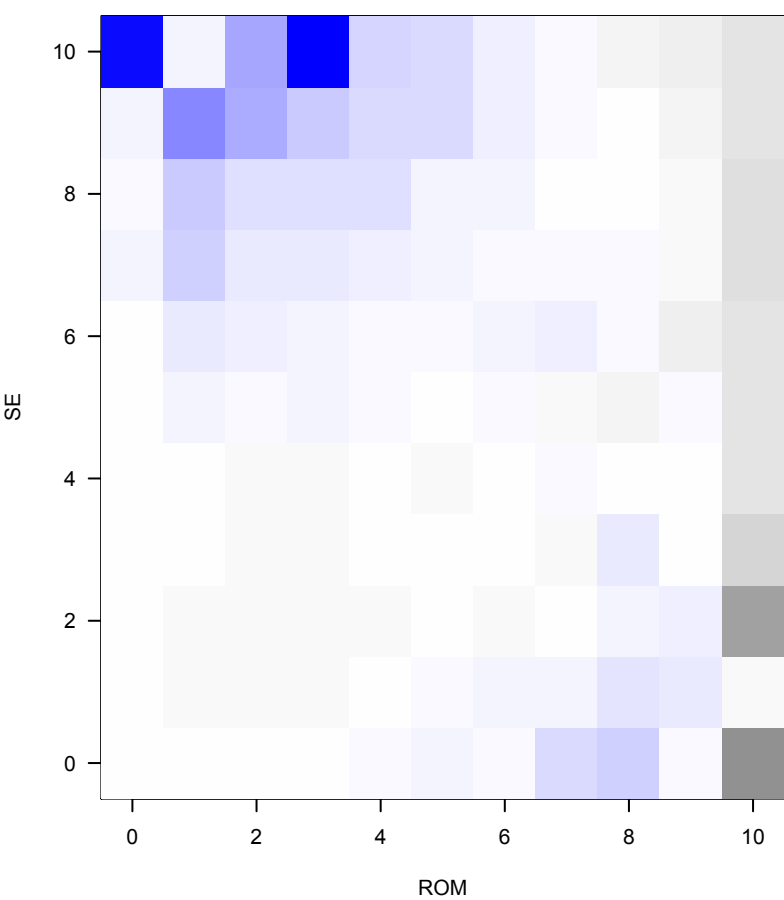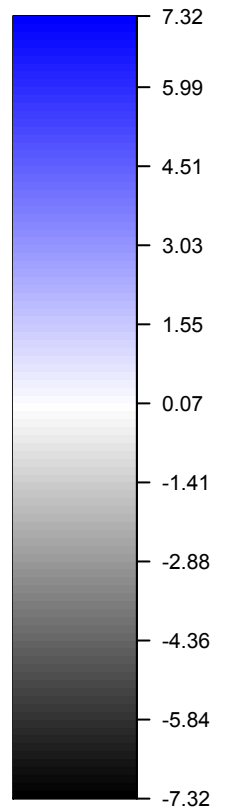**Marginal SFS**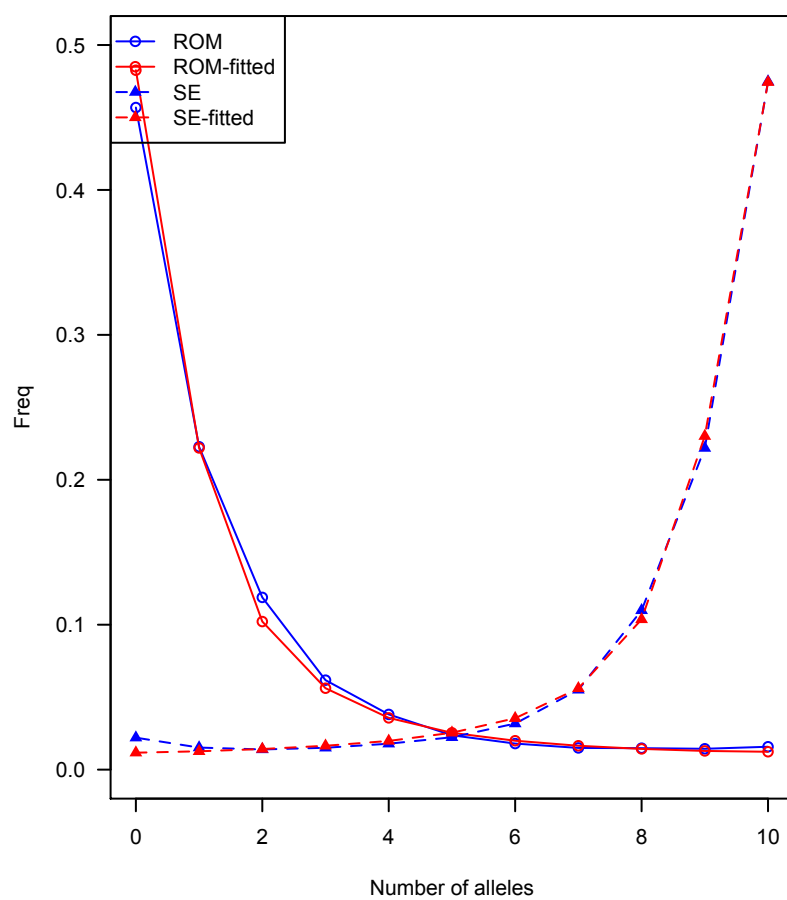

Supplement: EVA-12-1539-s001.pdf [file EVA-12-1539-s001.pdf]
