# Supplementary material for: Genomic data provide new insights on the demographic history and the extent of recent material transfers in Norway spruce
Source: PubMed Central journal article supplement (PMC6708423; doi:10.1111/eva.12801), 2019-04-30
Supplement: EVA-12-1539-s002.pdf [file EVA-12-1539-s002.pdf]

**Observed**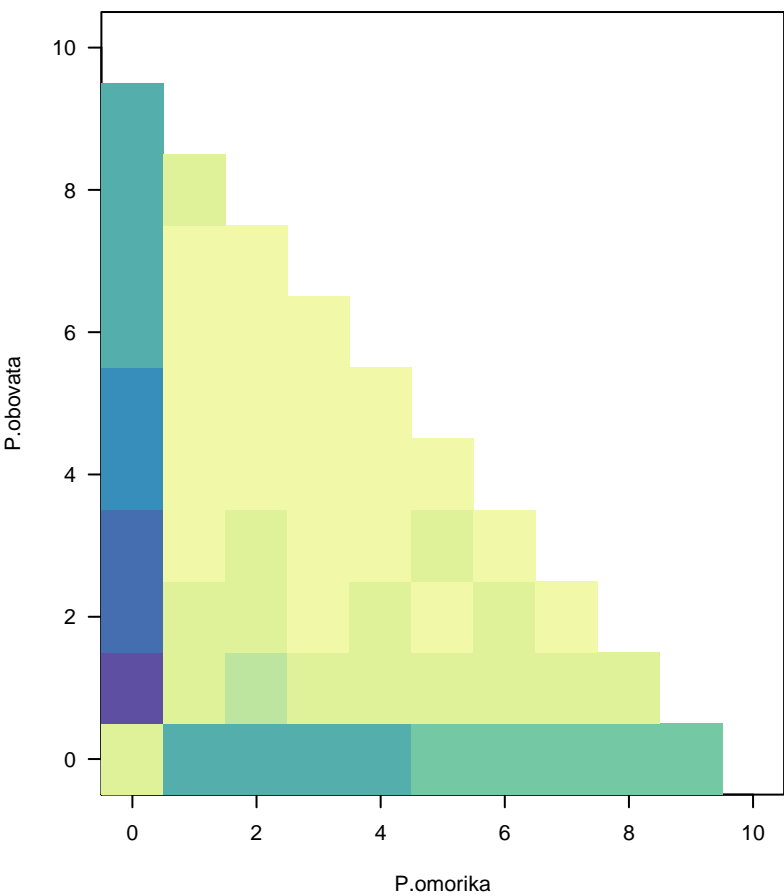**Model**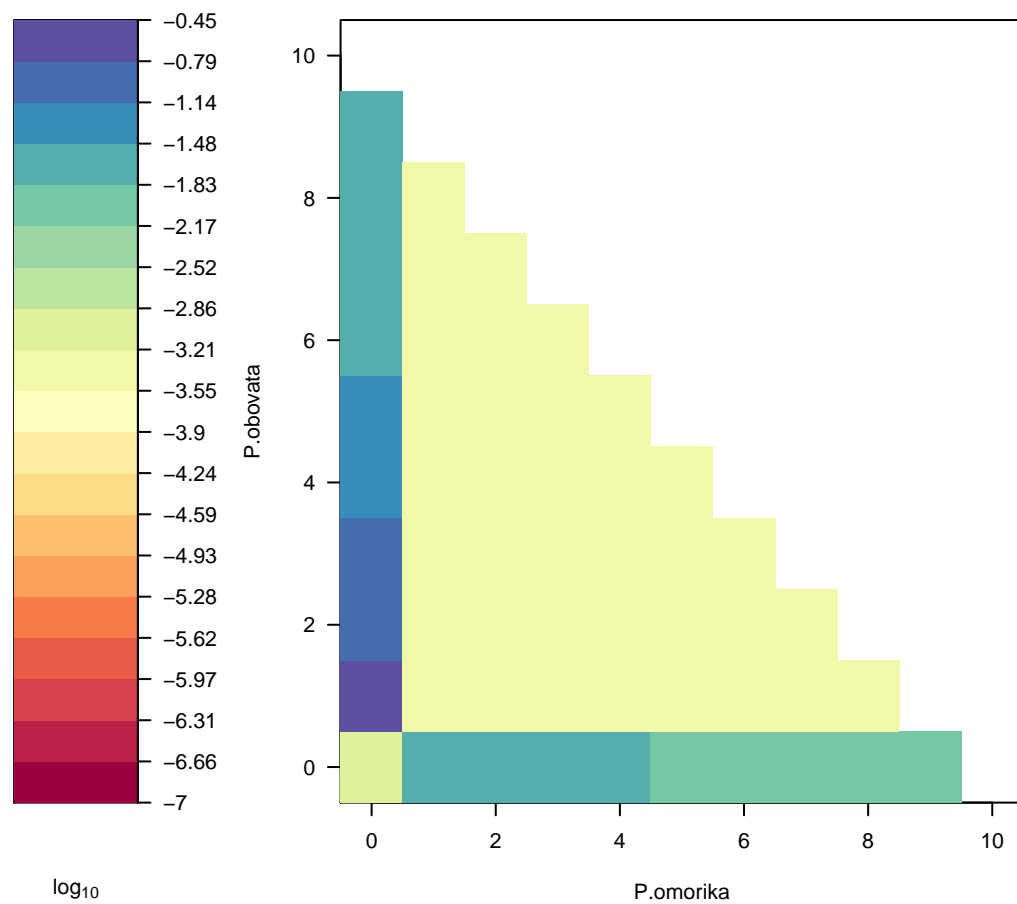**Residual**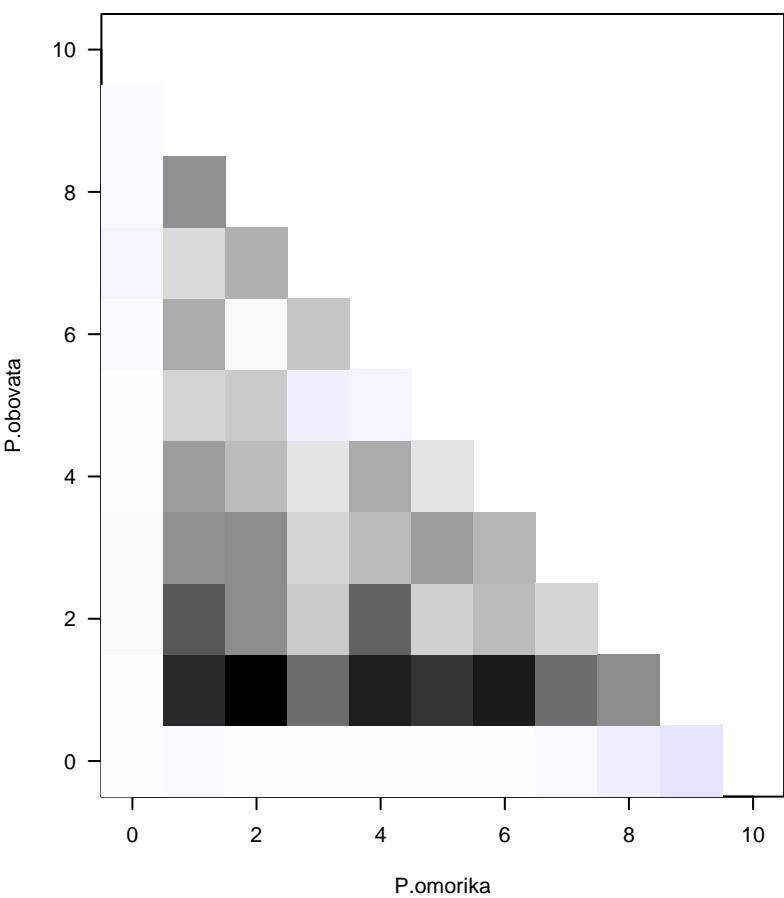**Marginal SFS**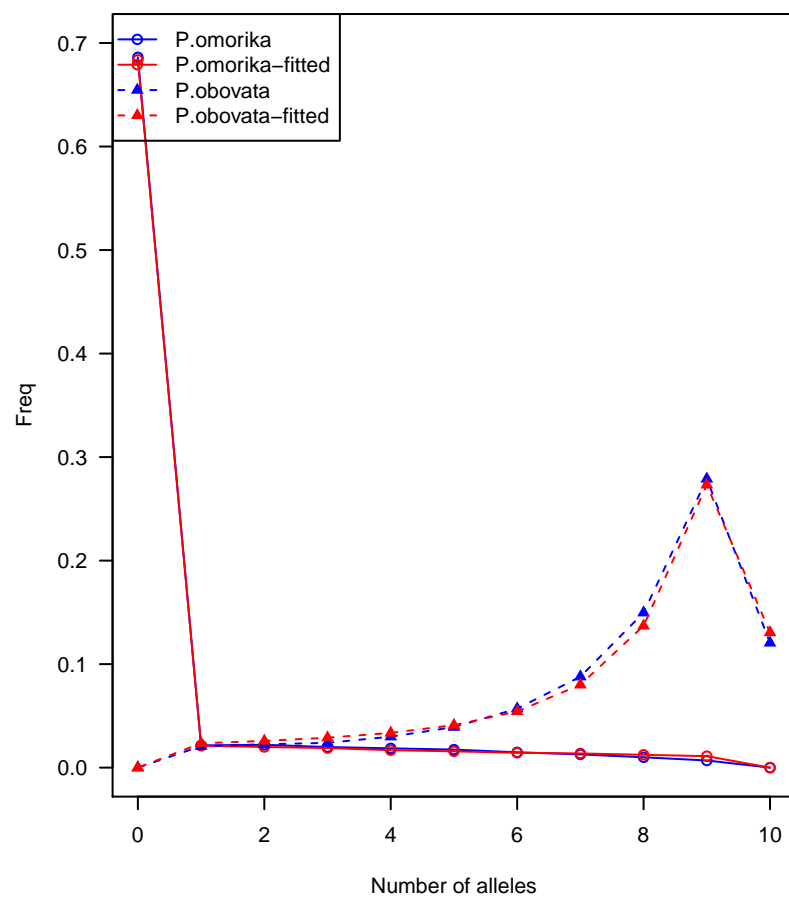

**Observed**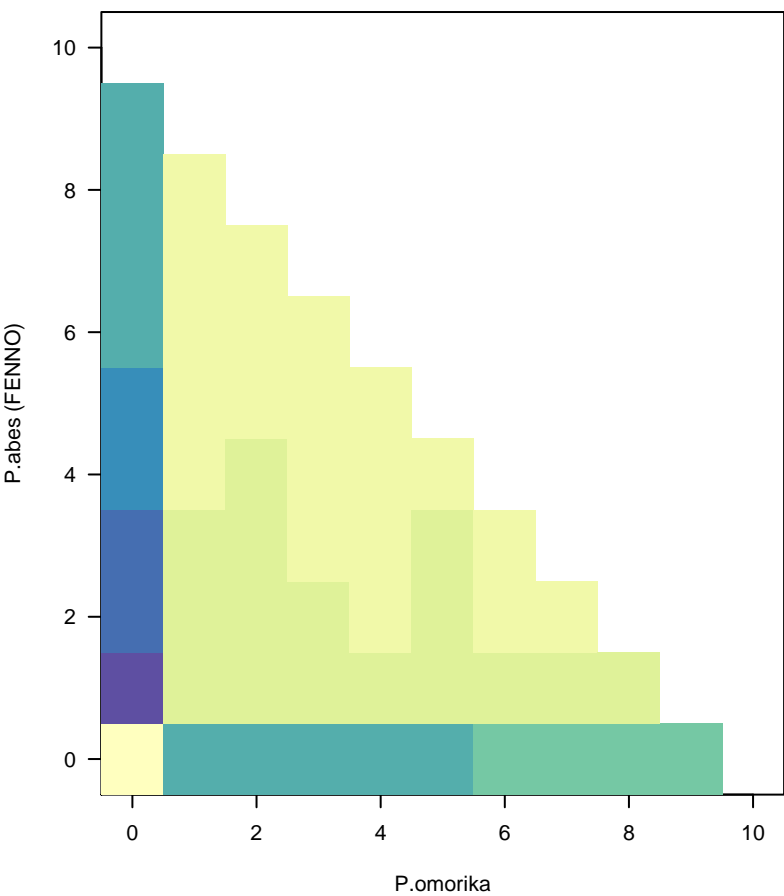**Model**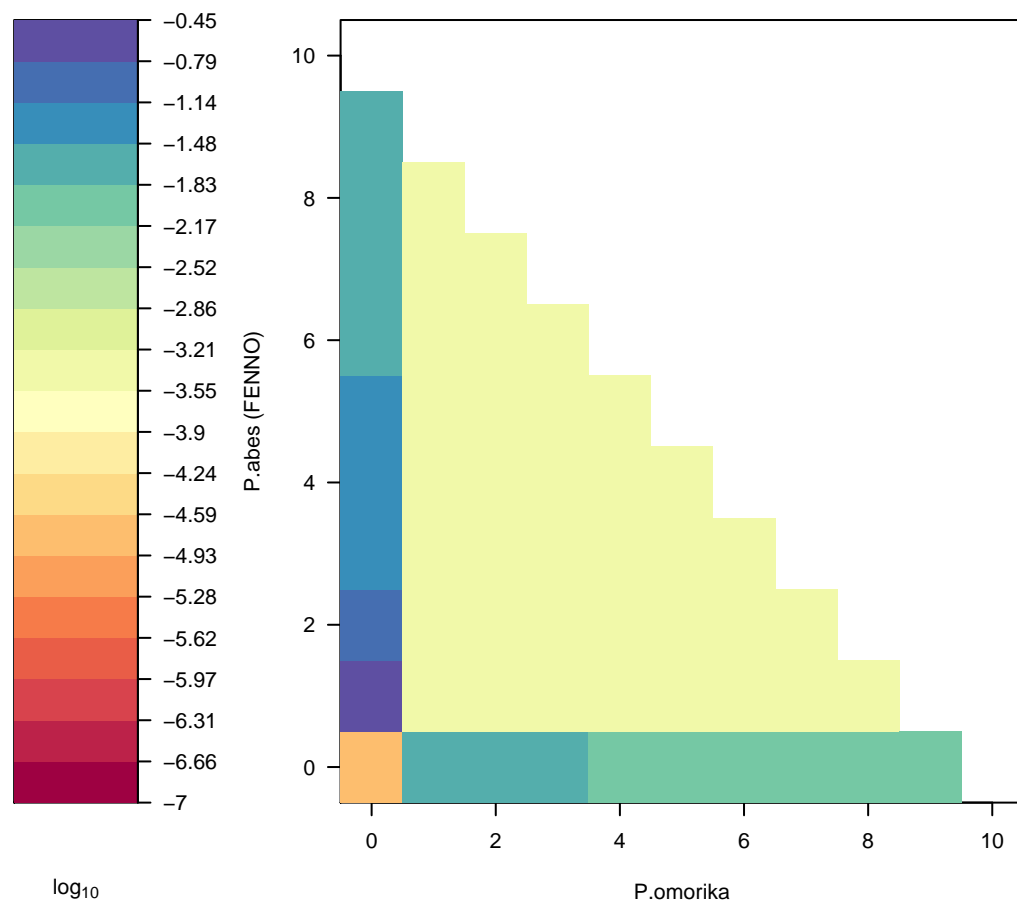**Residual**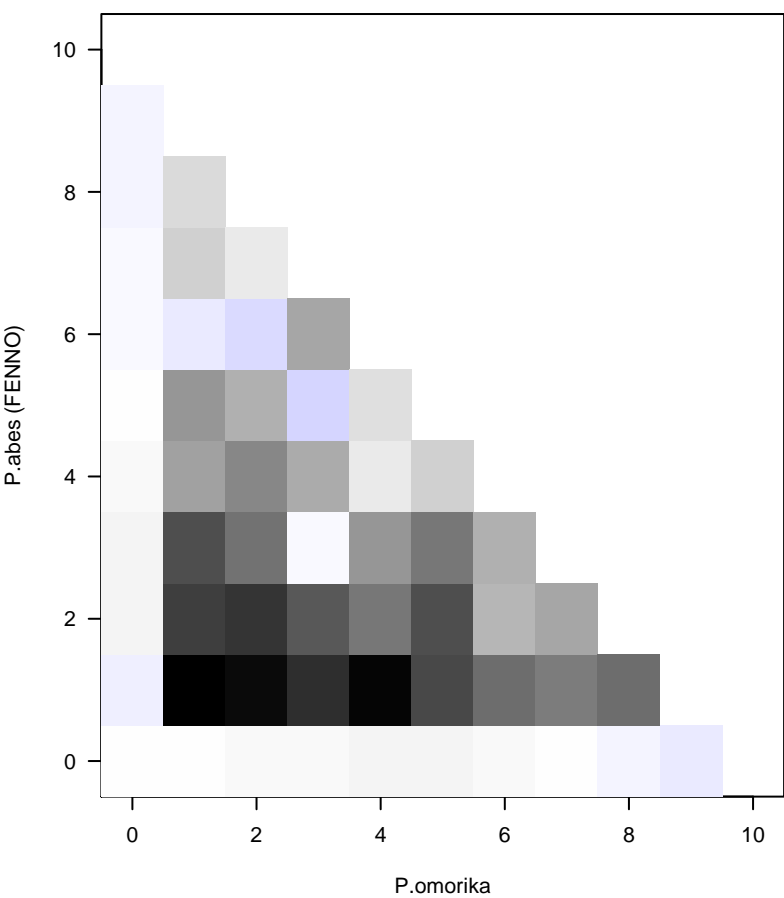**Marginal SFS**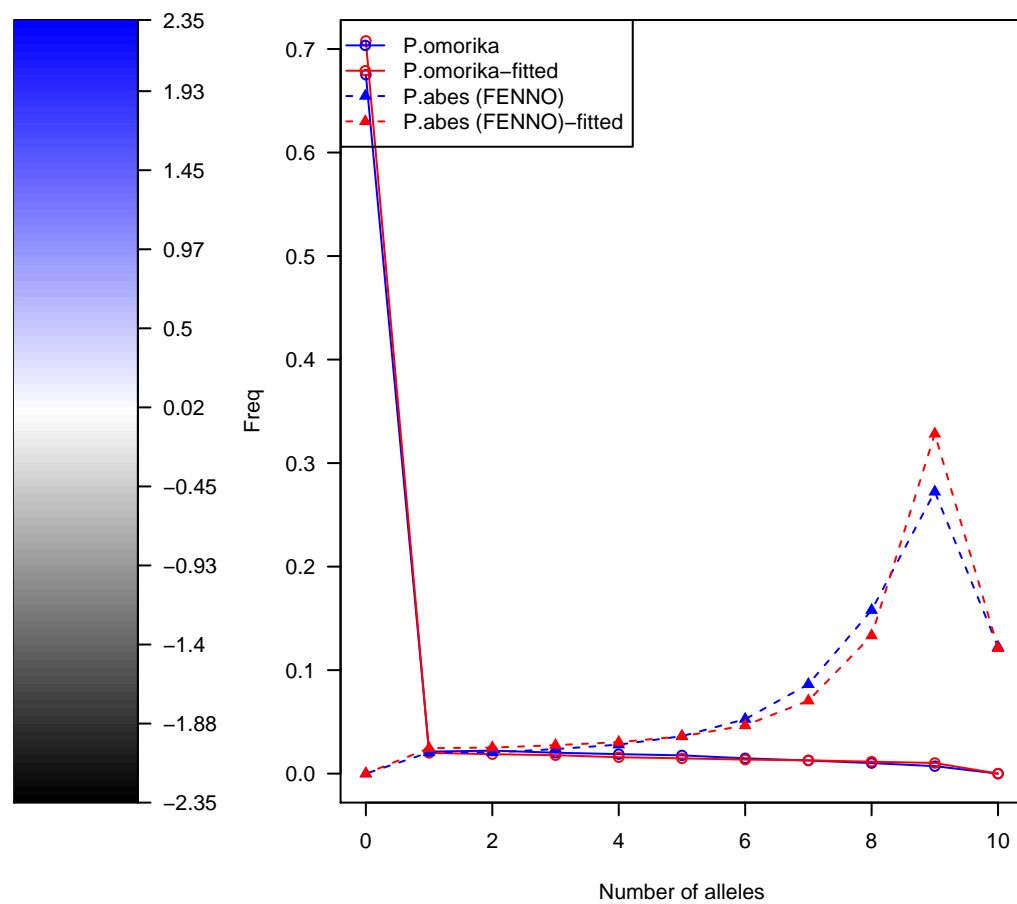

**Observed**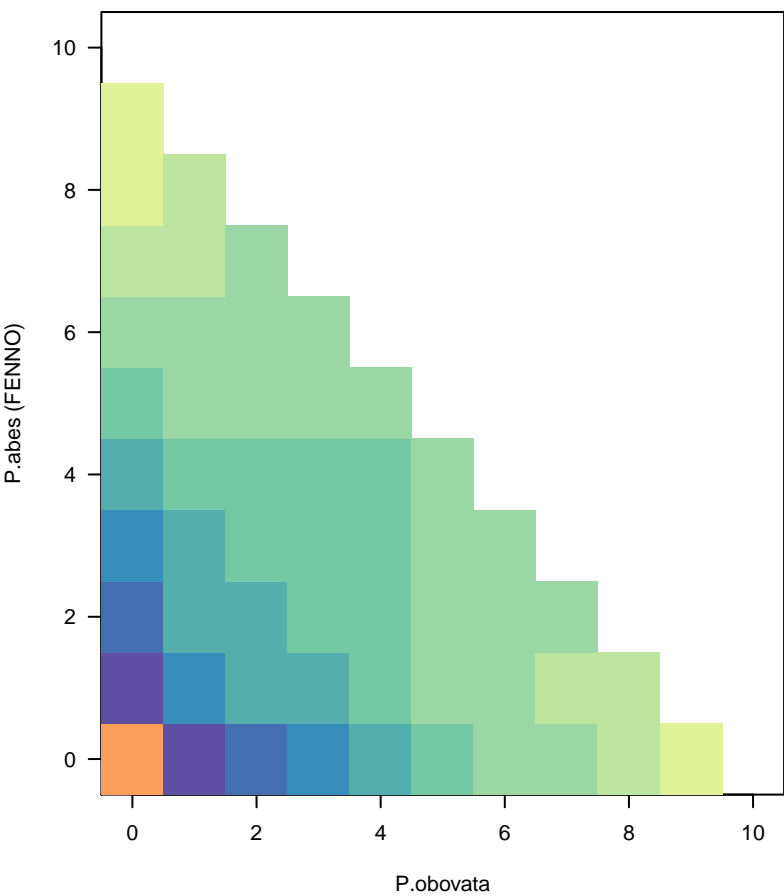**Model**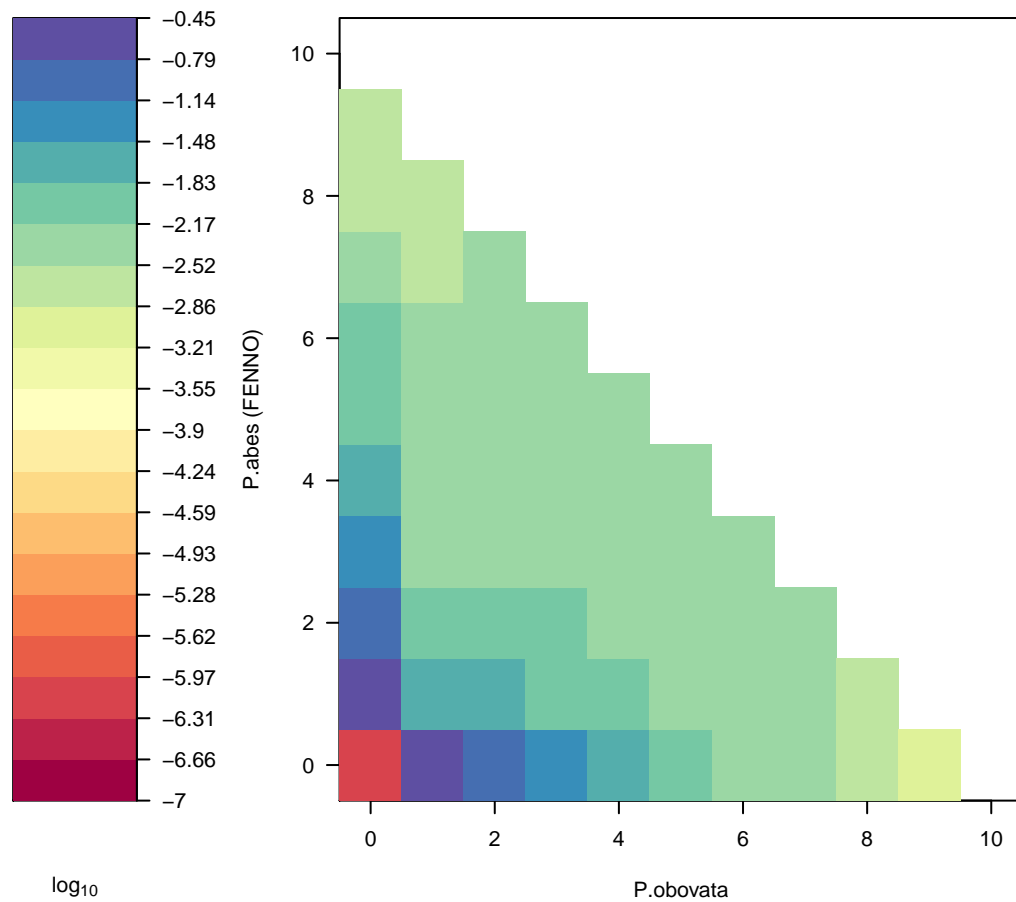**Residual**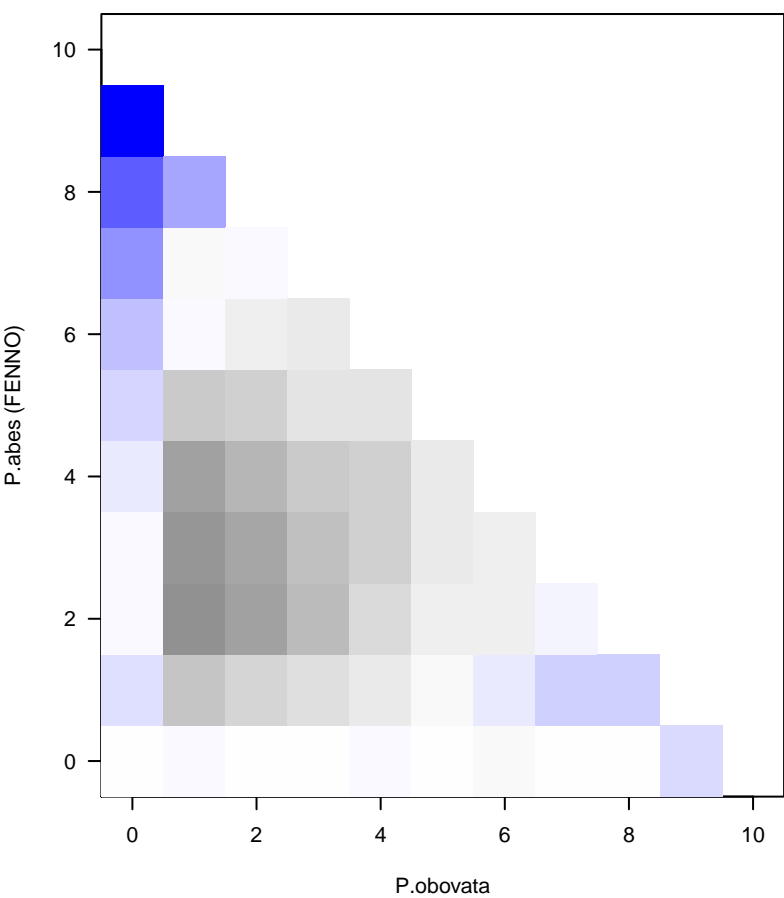**Marginal SFS**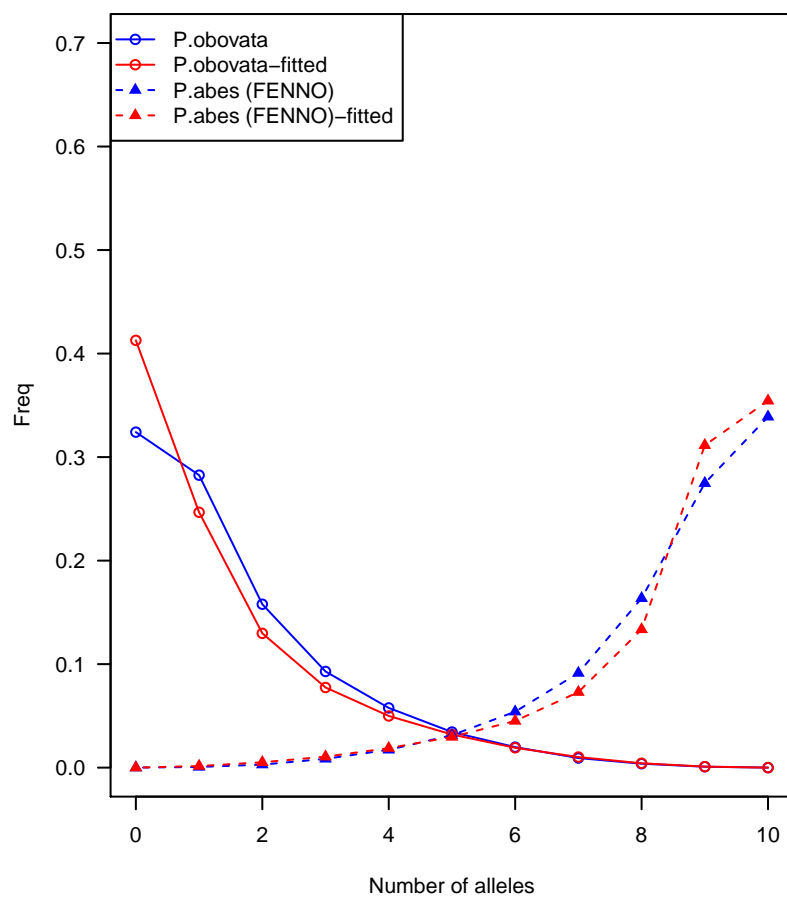

**Observed**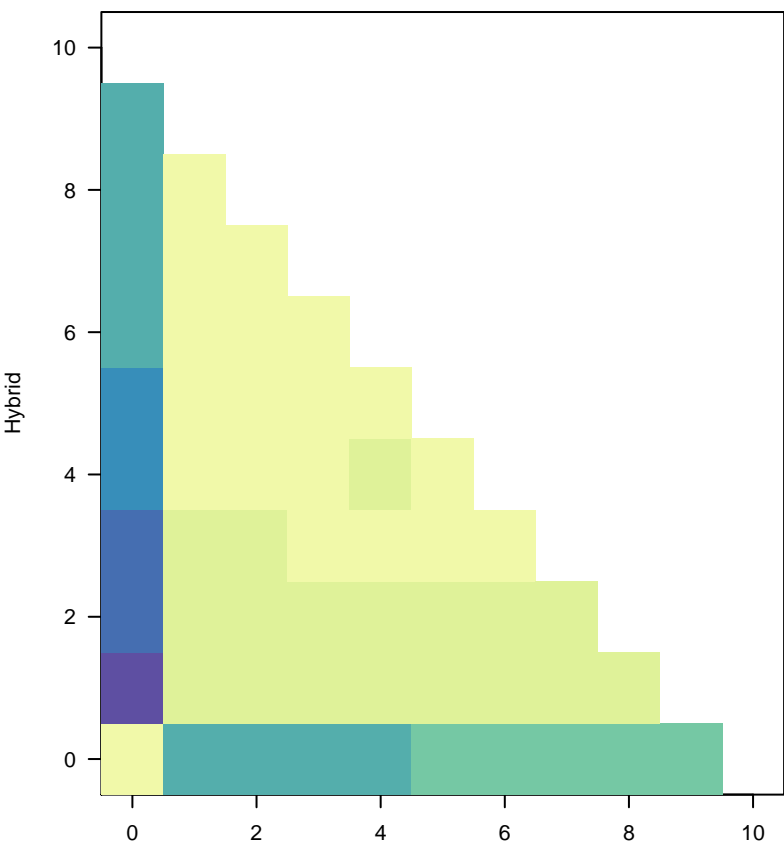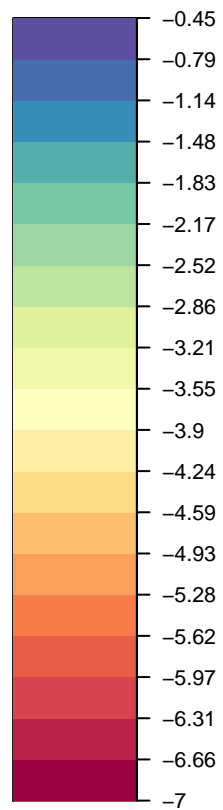**Model**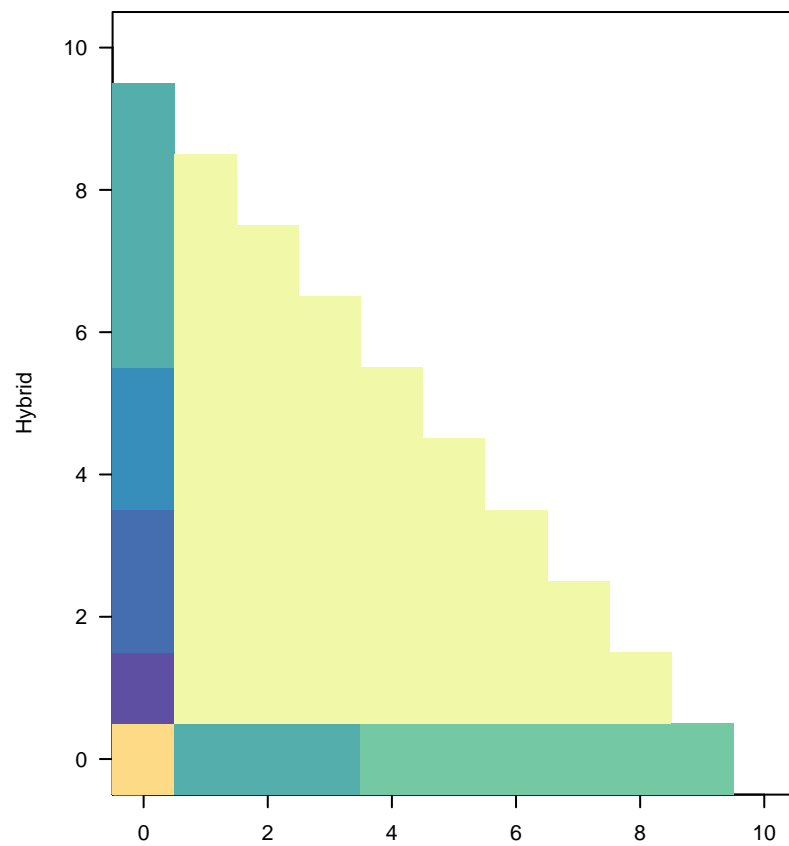 $\log_{10}$ **Residual**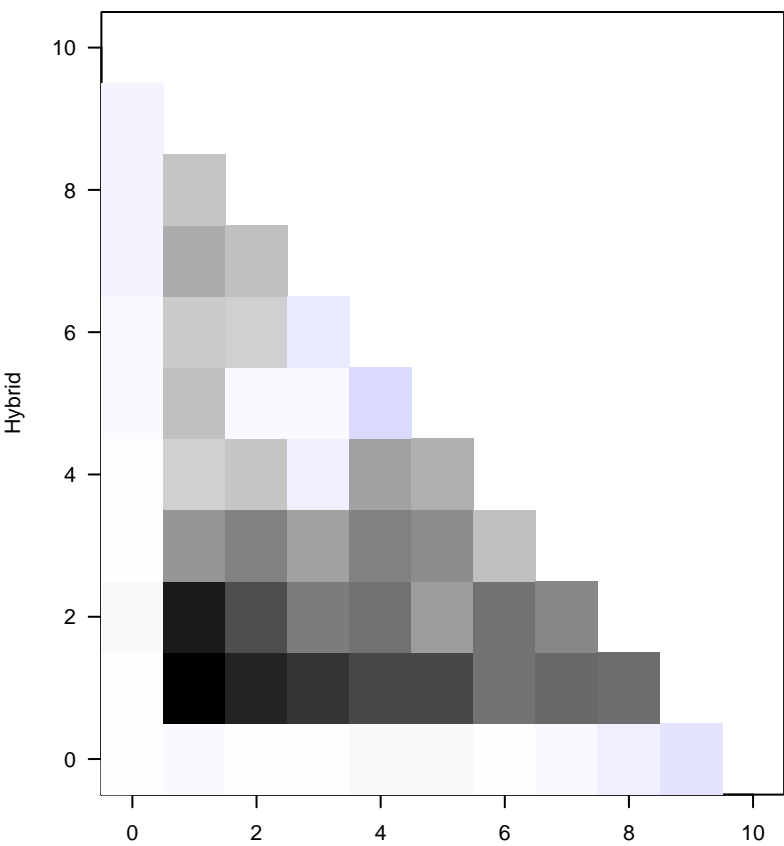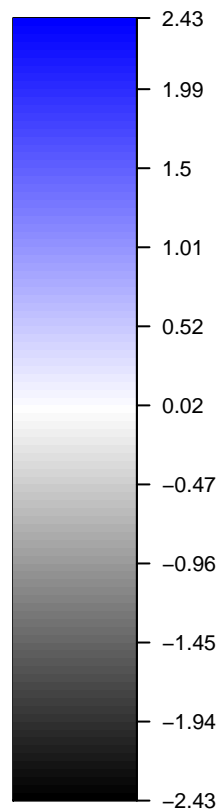**Marginal SFS**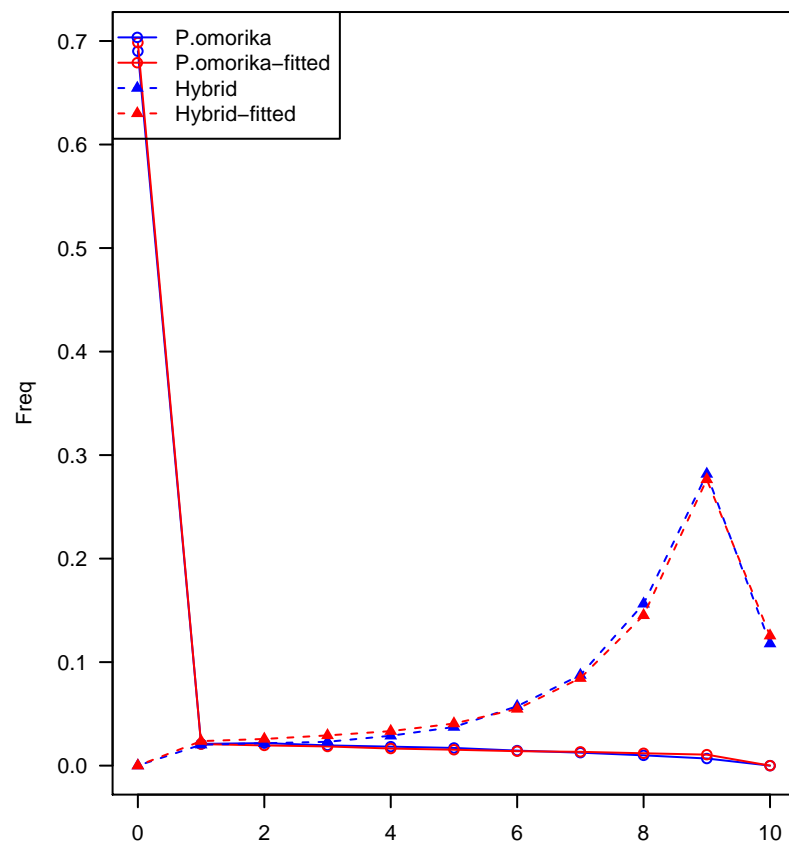

**Observed**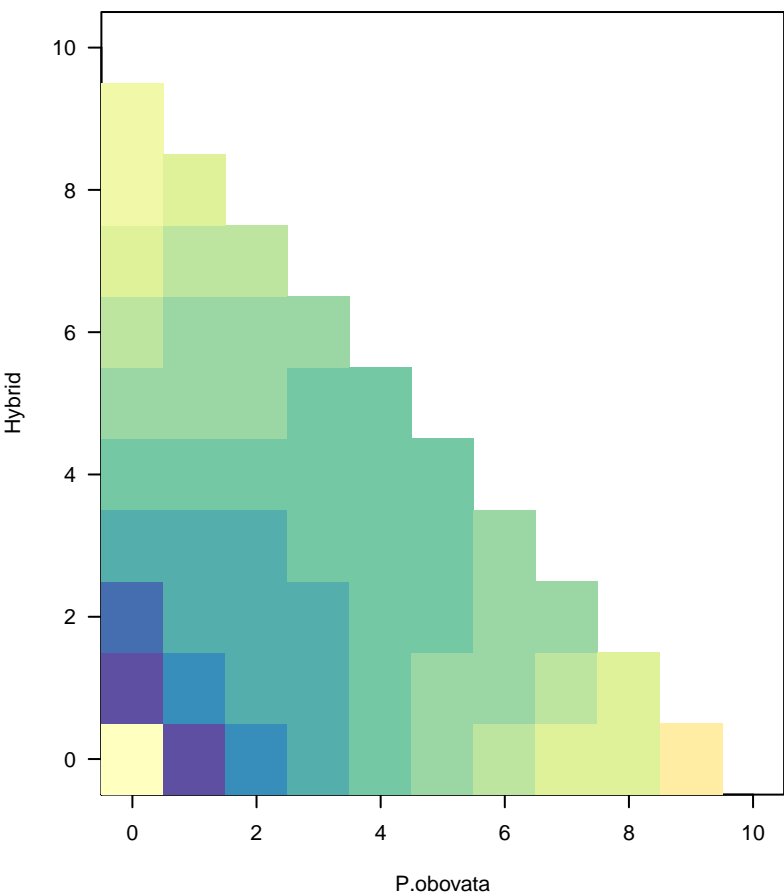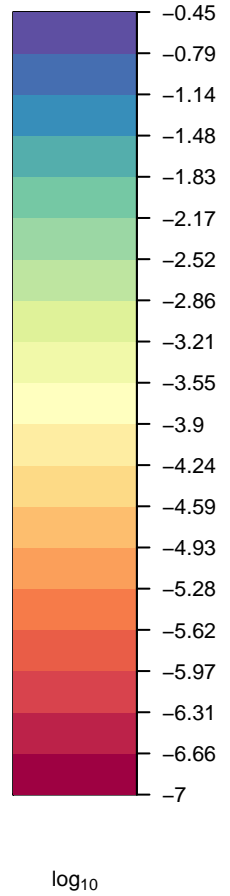**Model**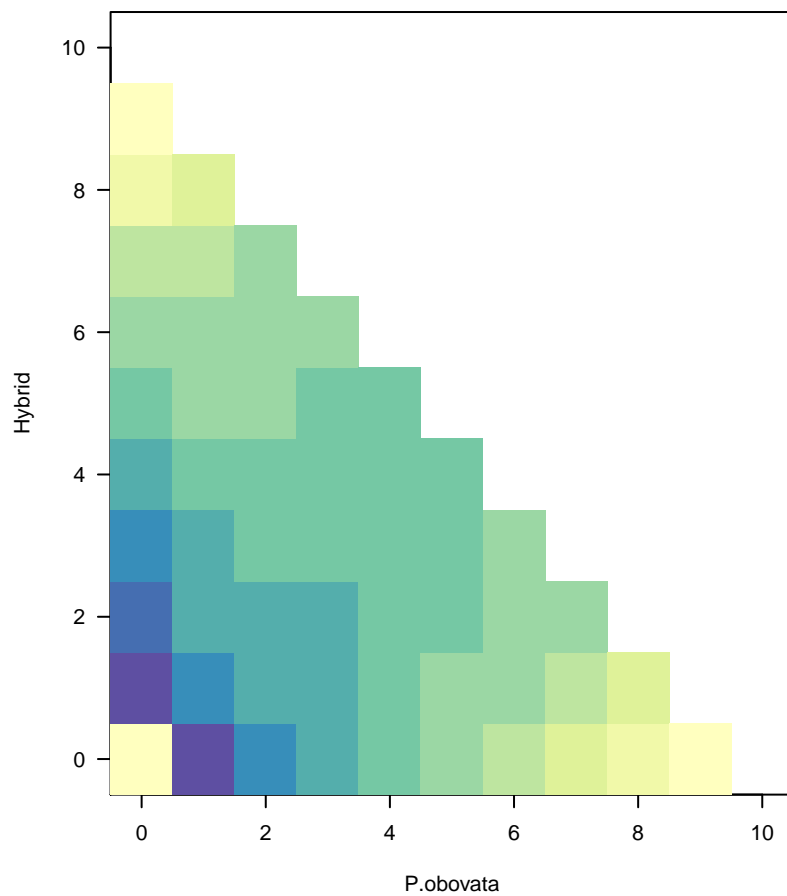**Residual**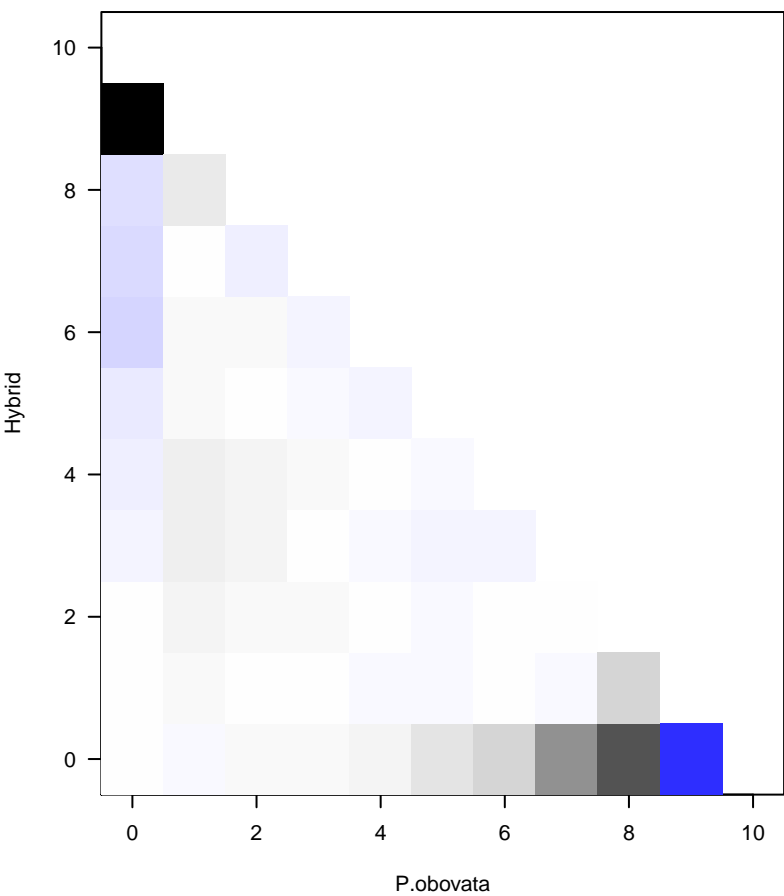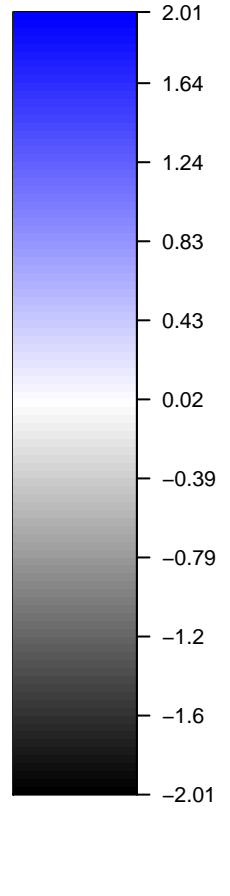**Marginal SFS**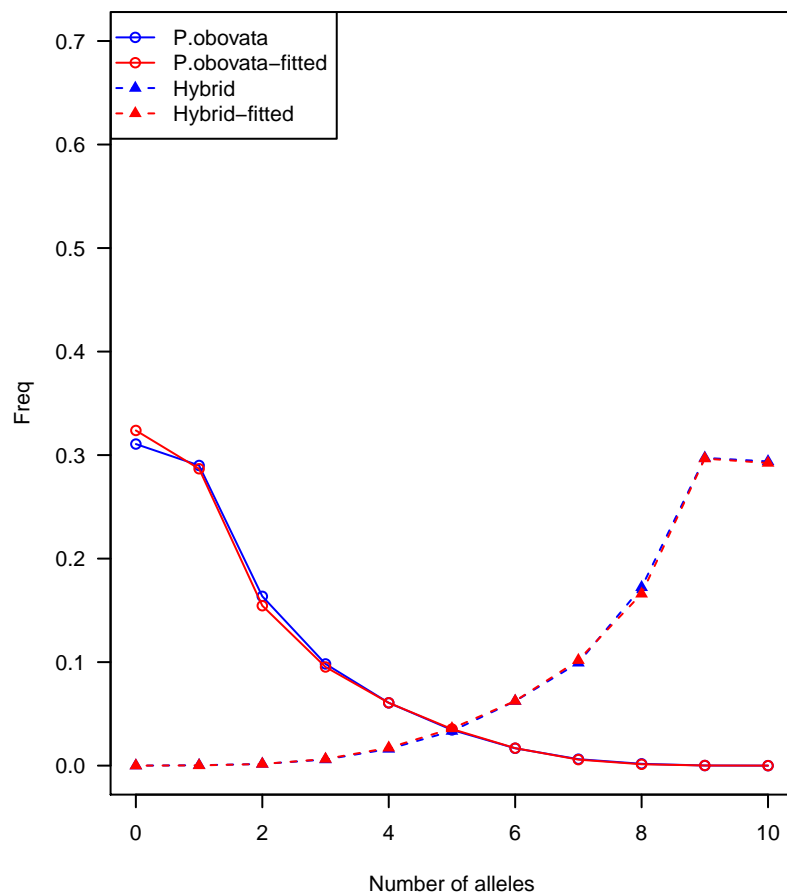

**Observed**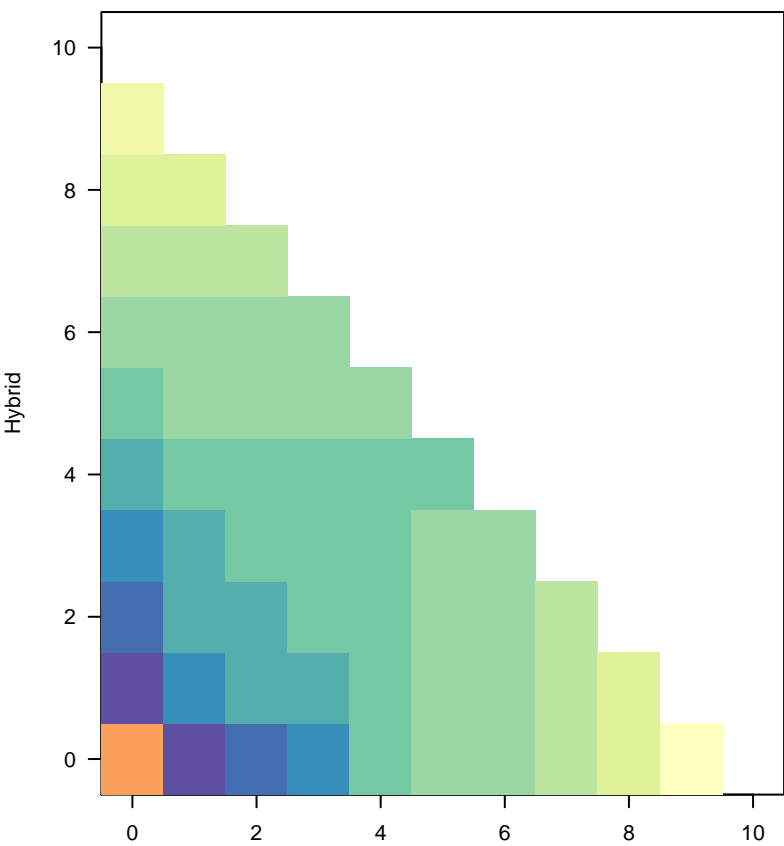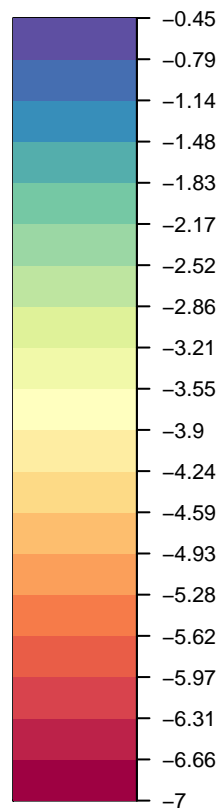**Model**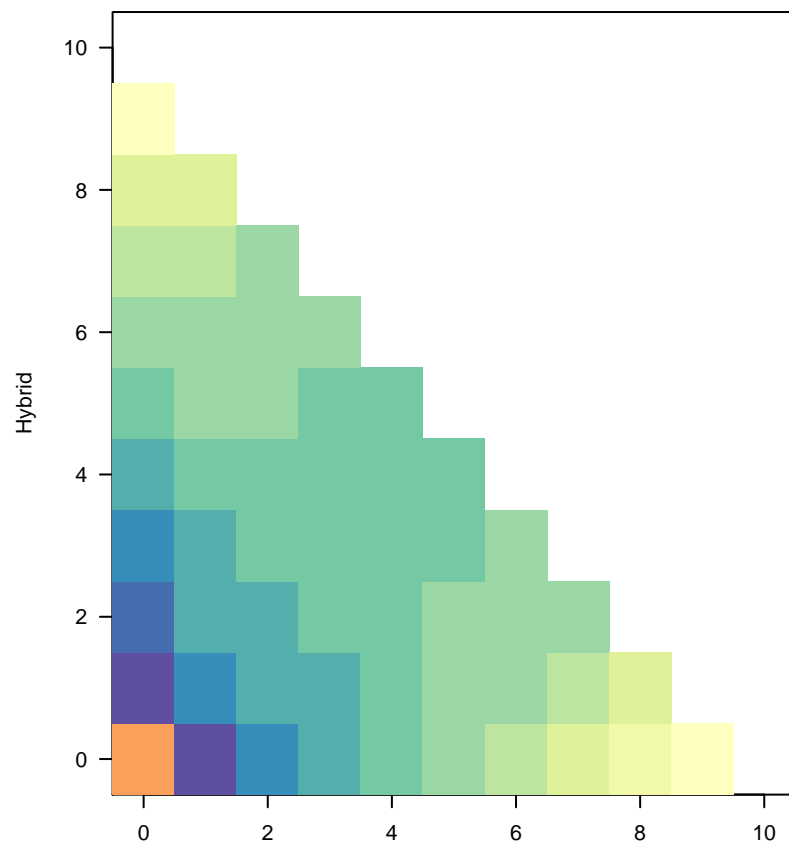 $\log_{10}$ **Residual**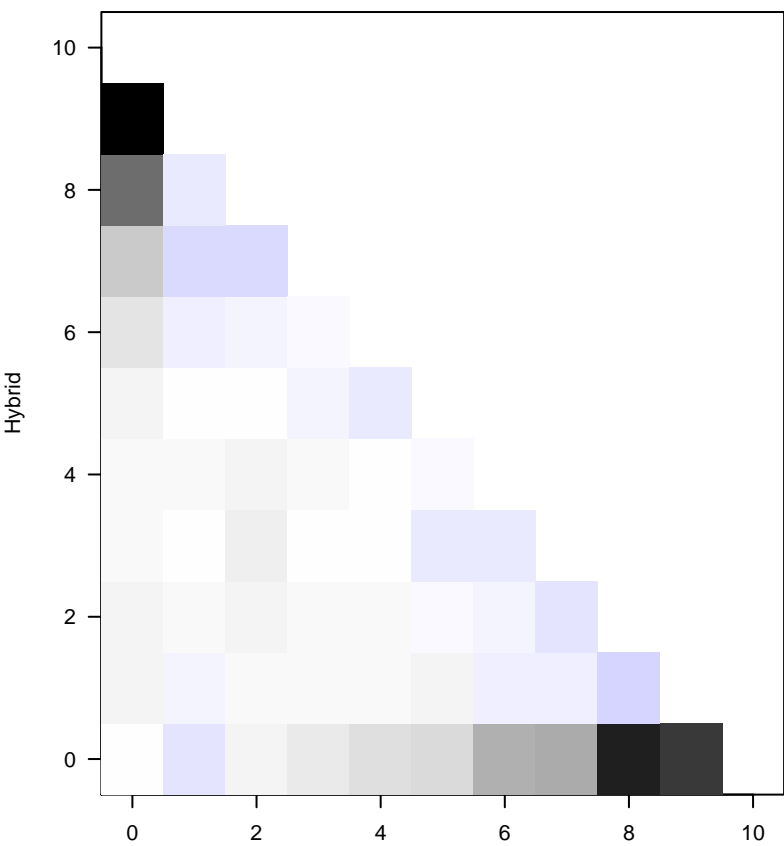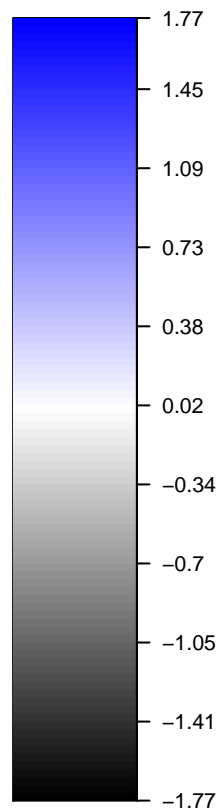**Marginal SFS**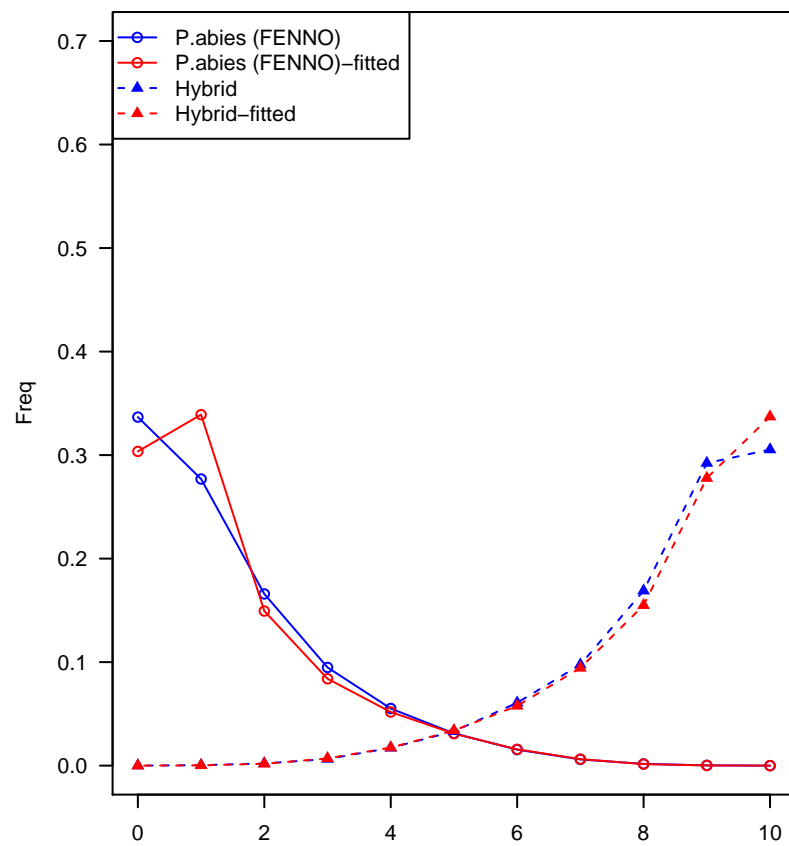

**Observed**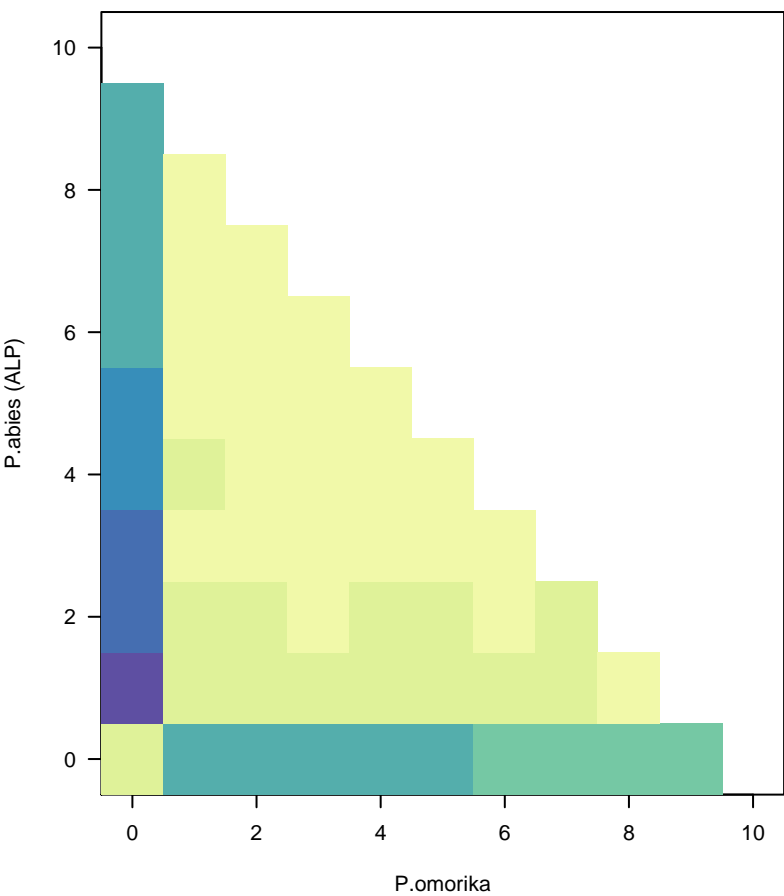**Model**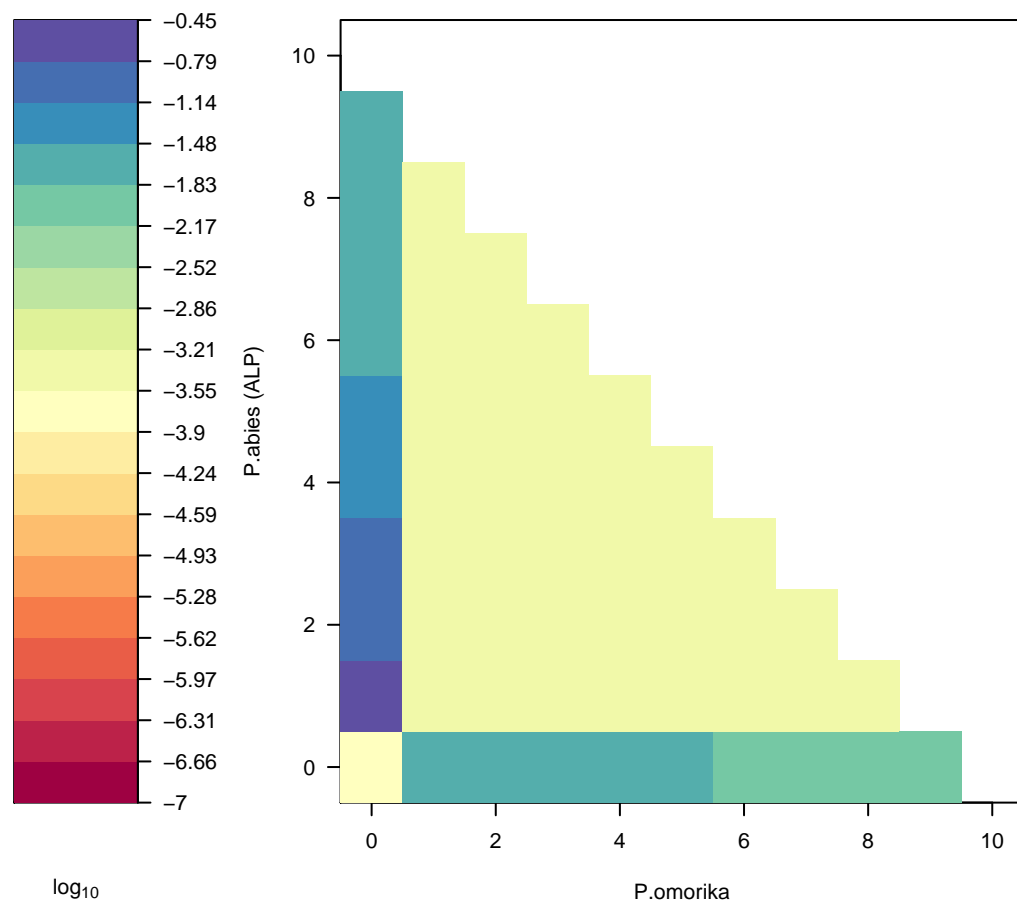**Residual**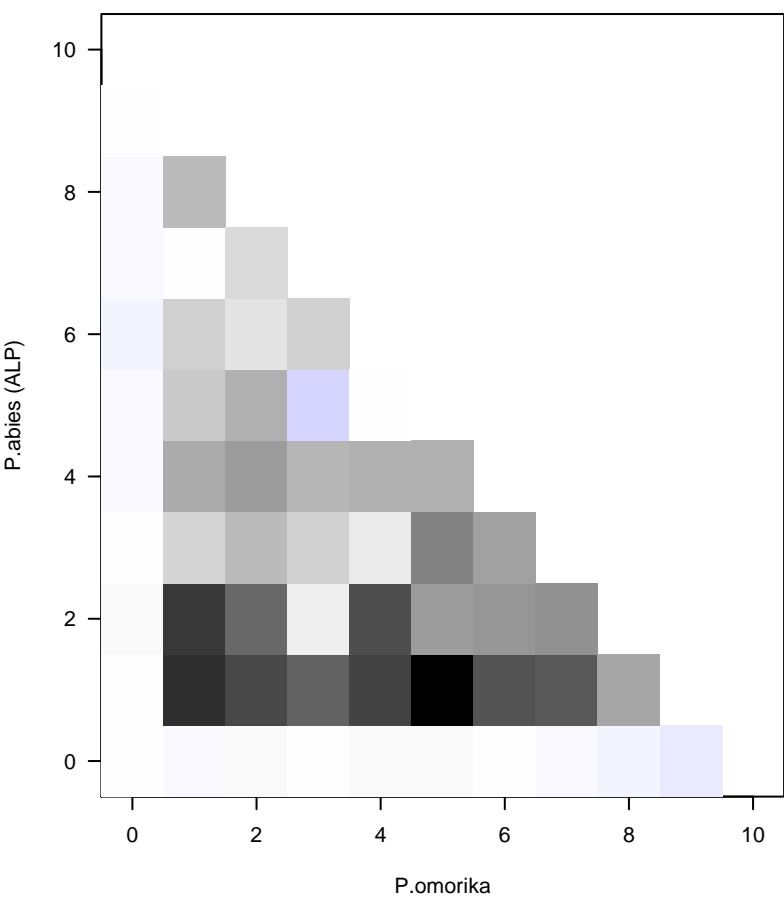**Marginal SFS**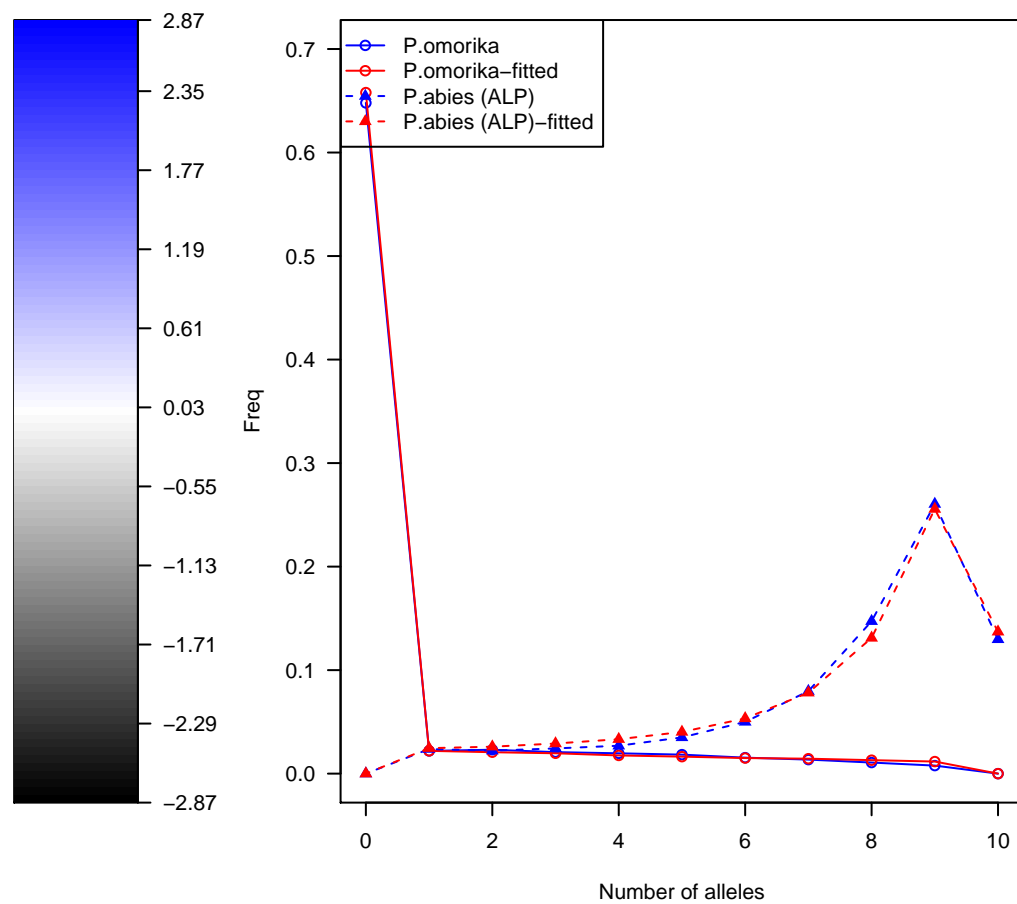

**Observed**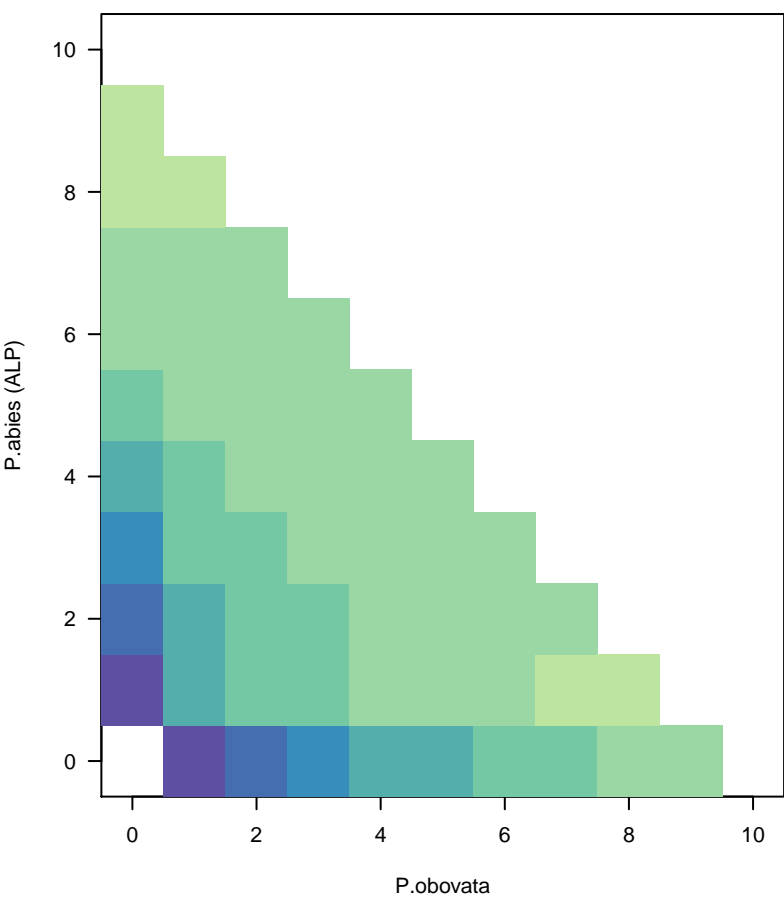**Model**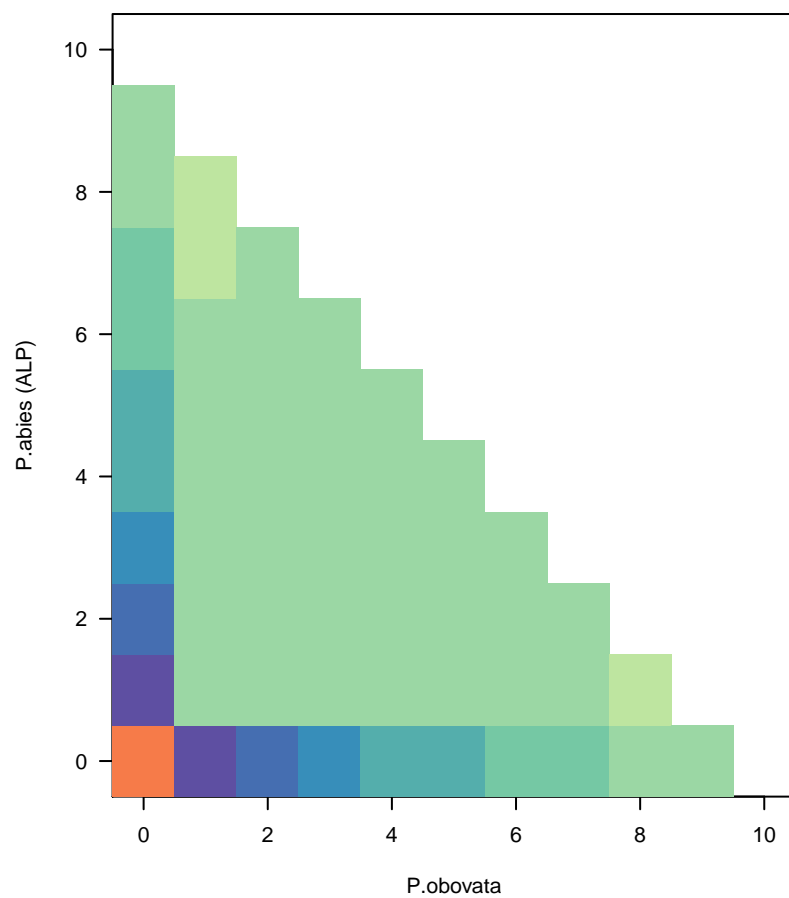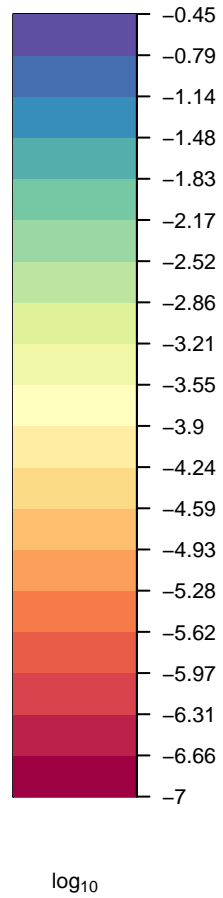**Residual**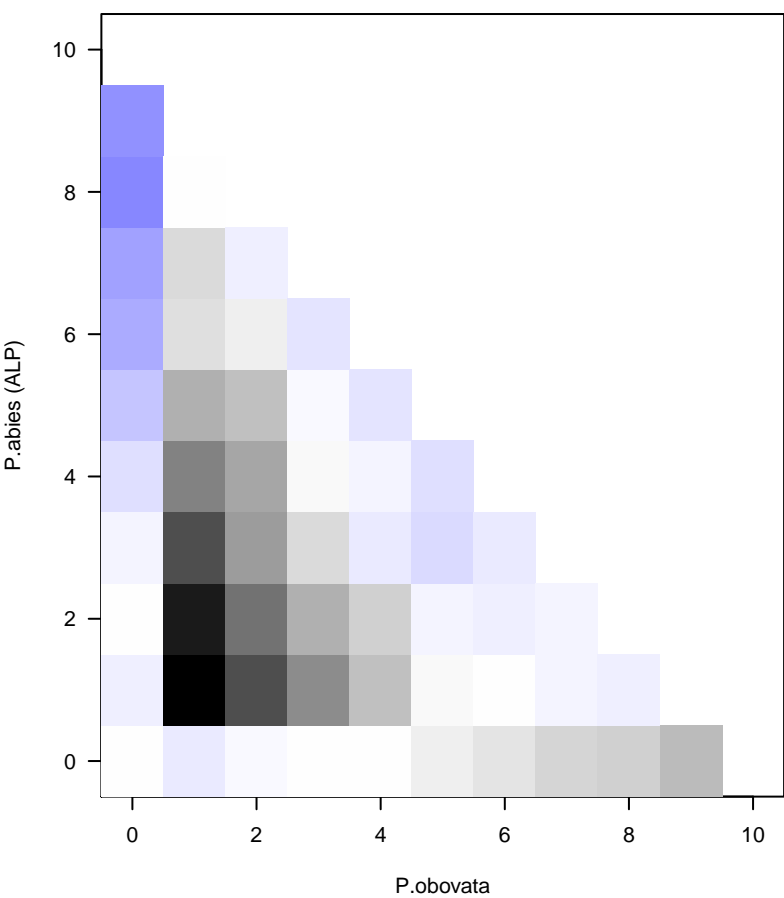**Marginal SFS**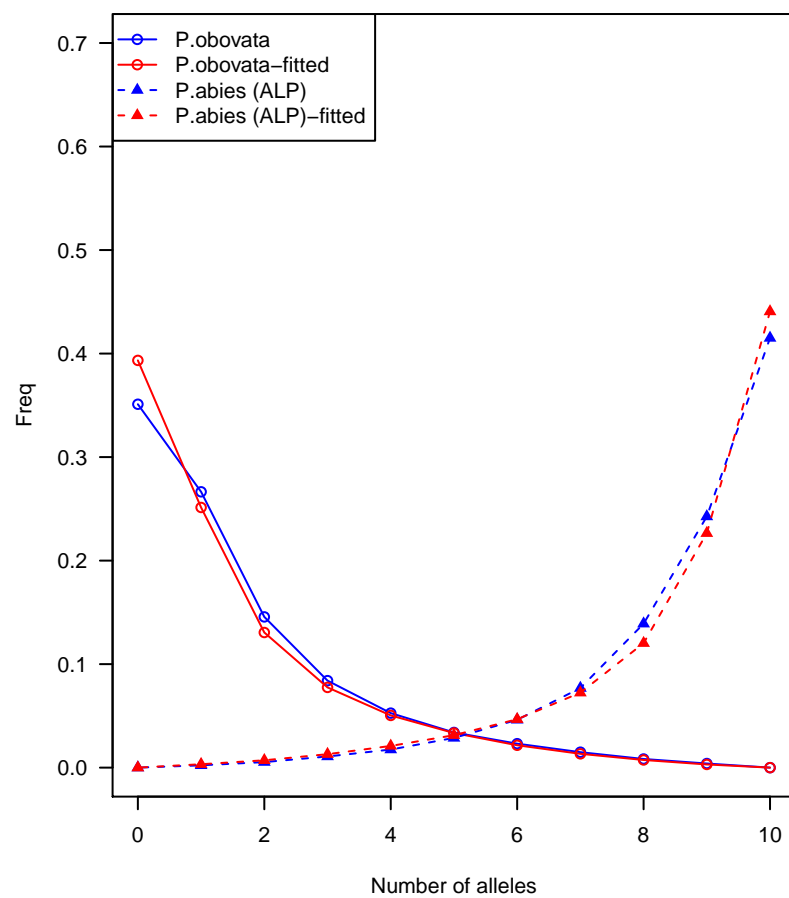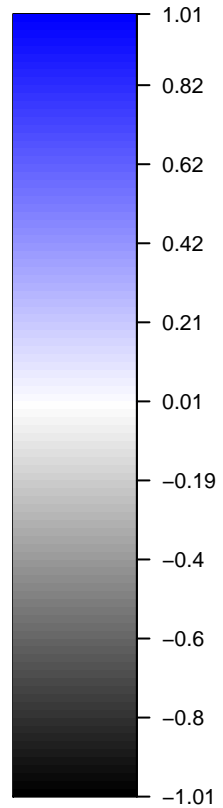



**Observed**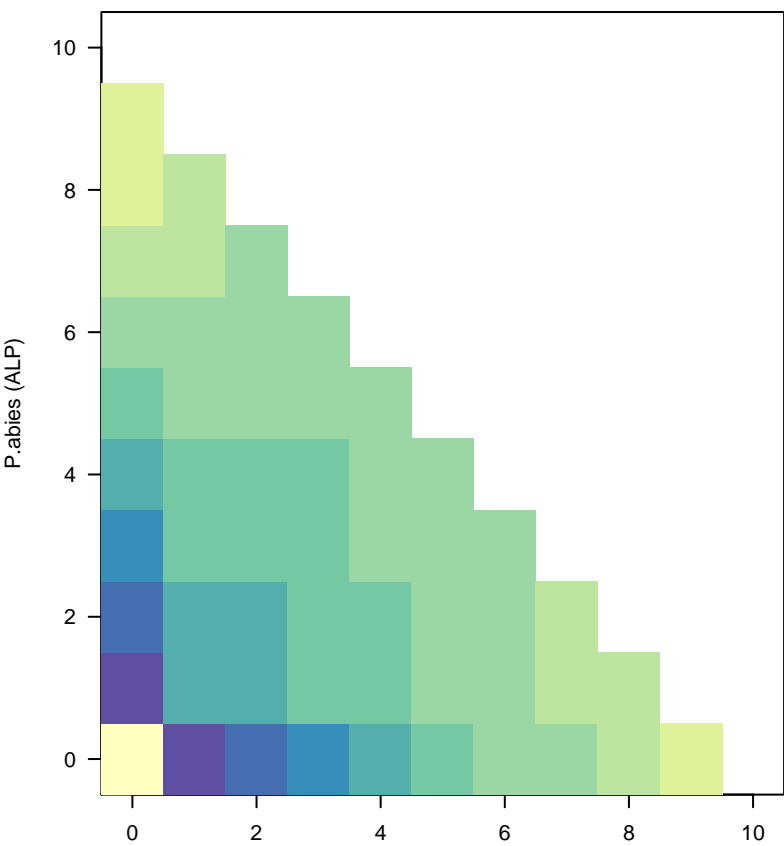**Model**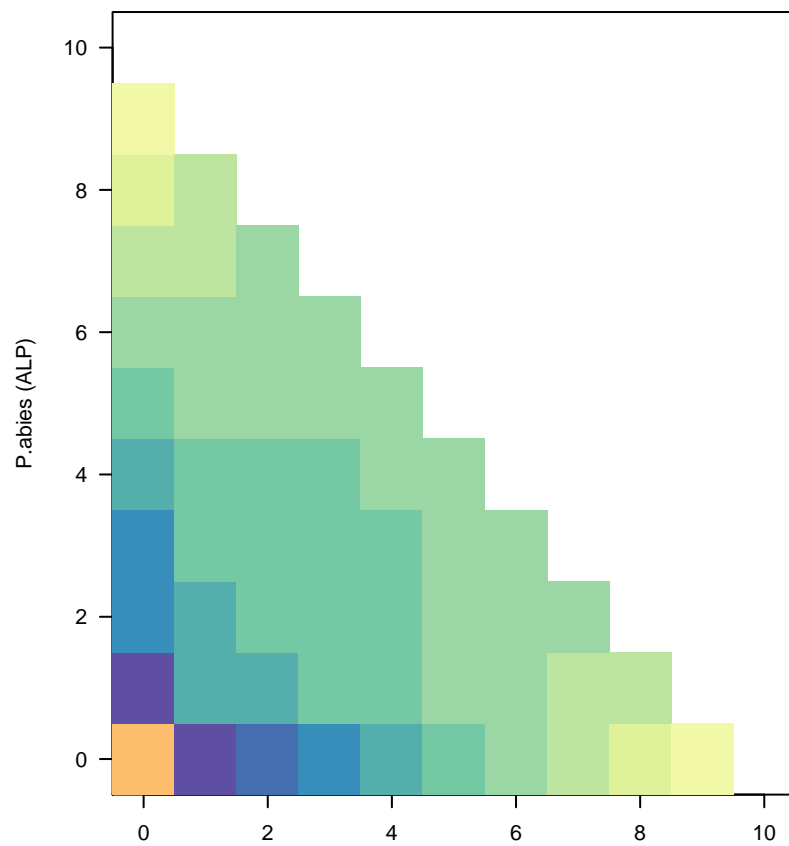 $\log_{10}$ **Residual**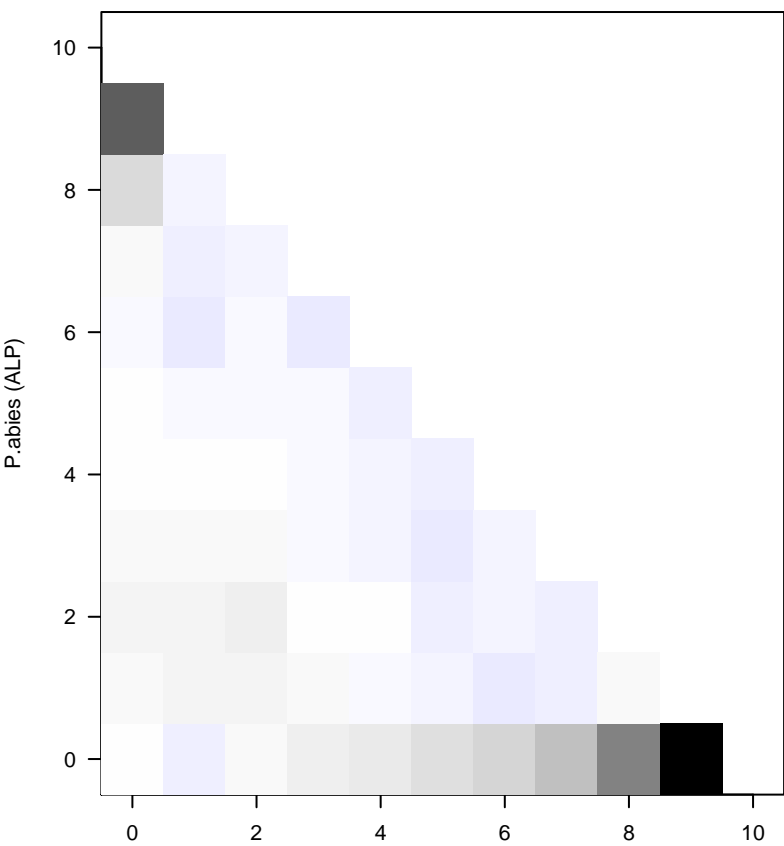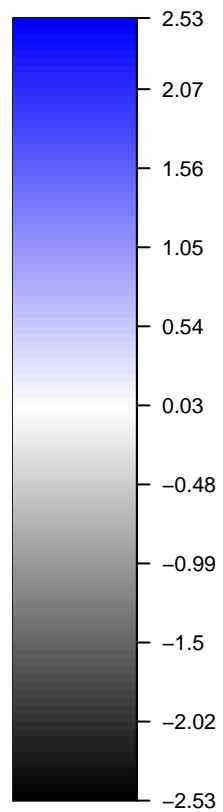**Marginal SFS**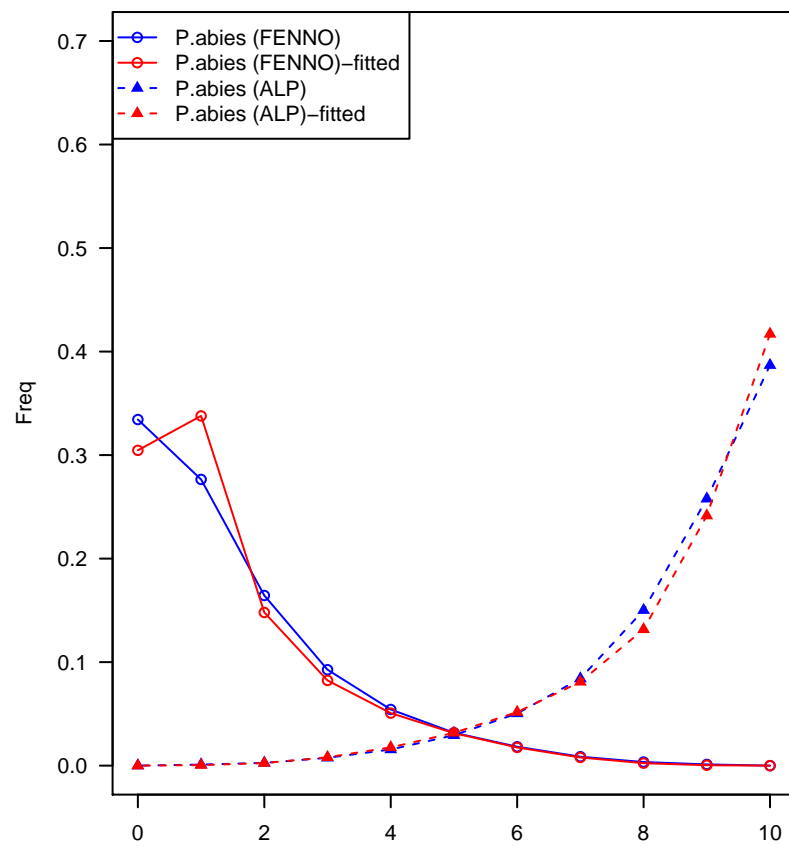

**Observed**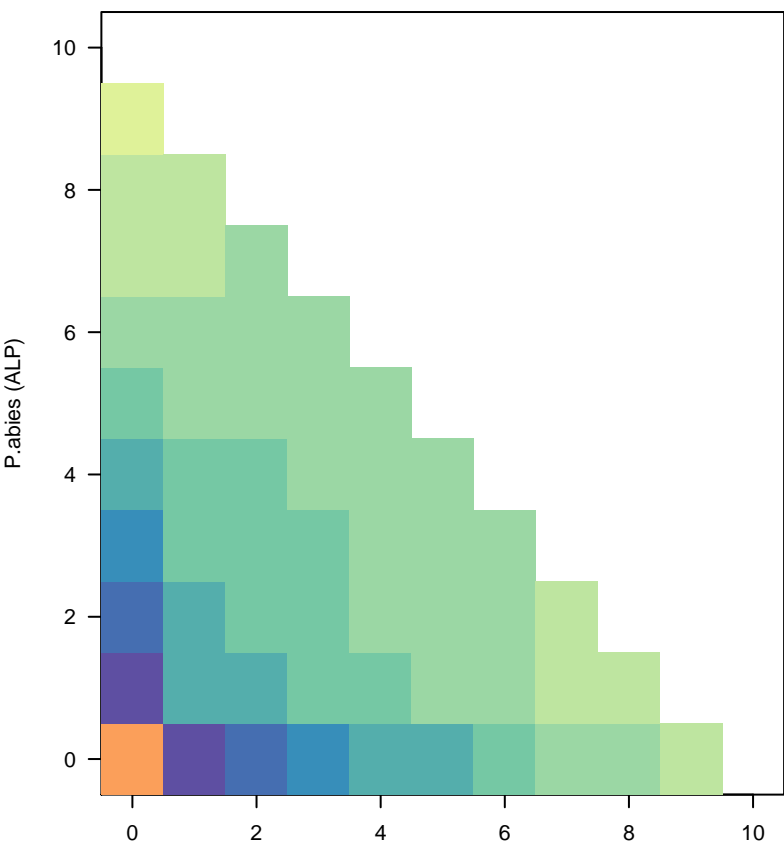**Model**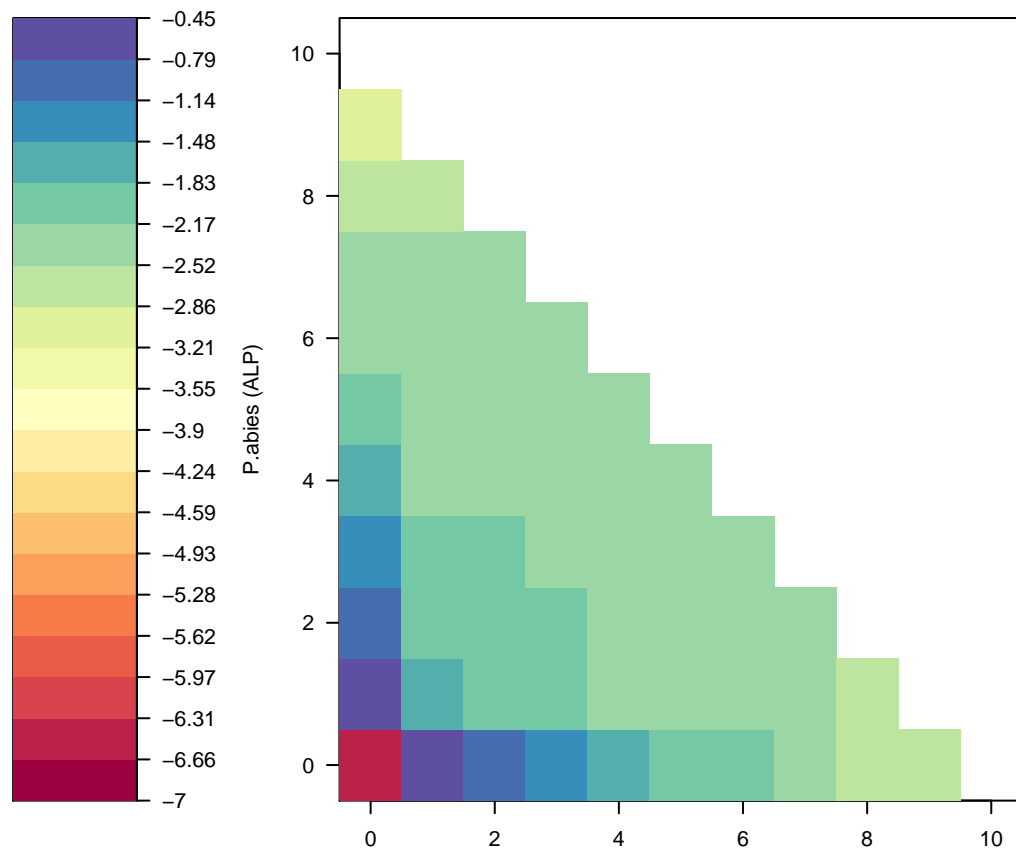**Residual**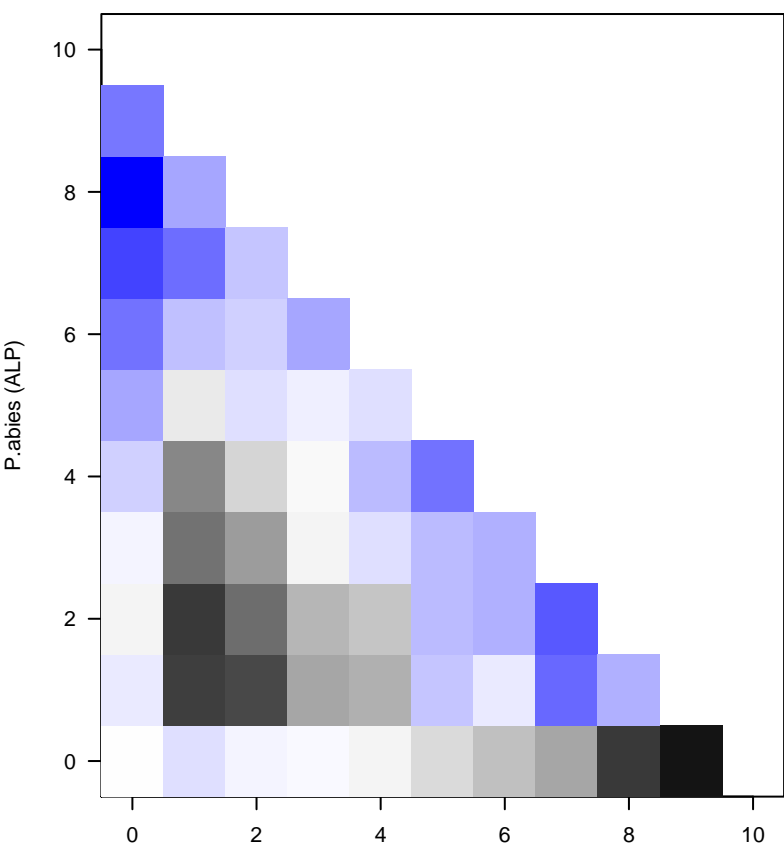**Marginal SFS**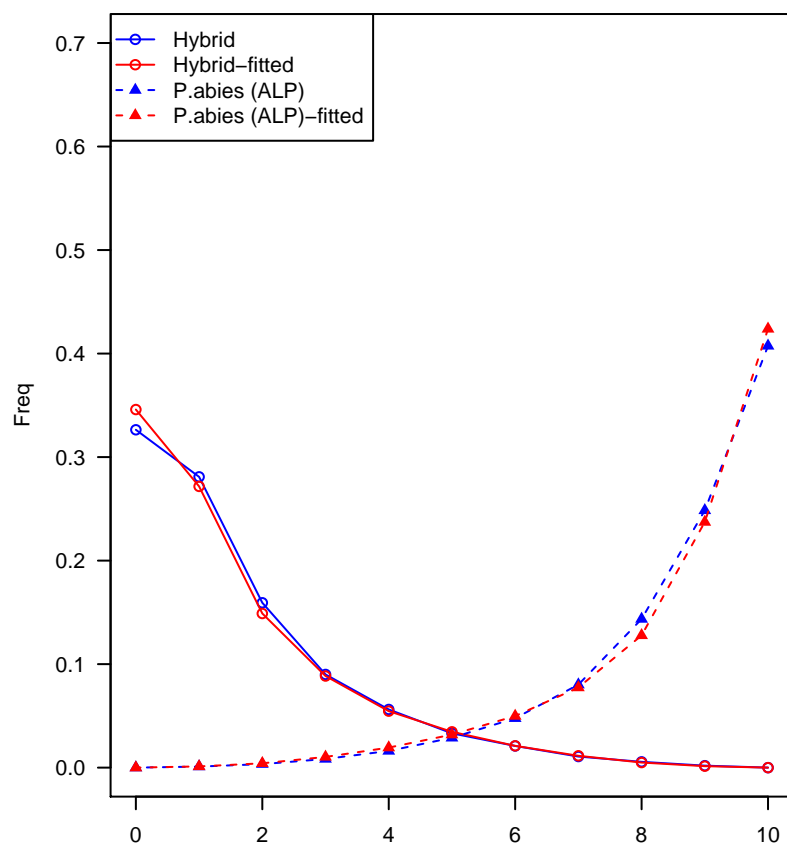

**Observed**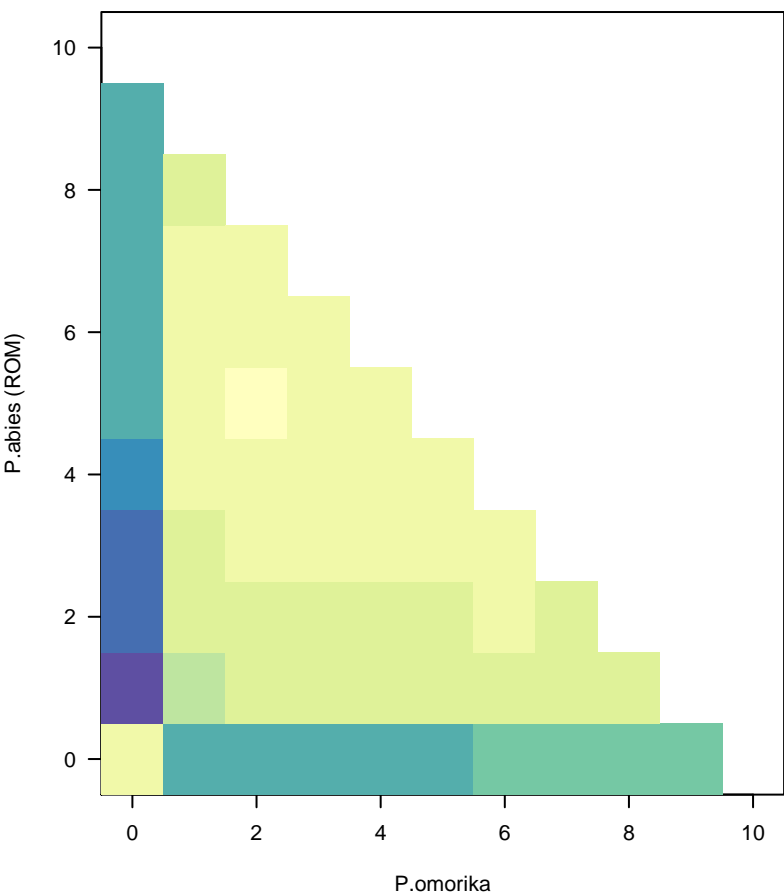**Model**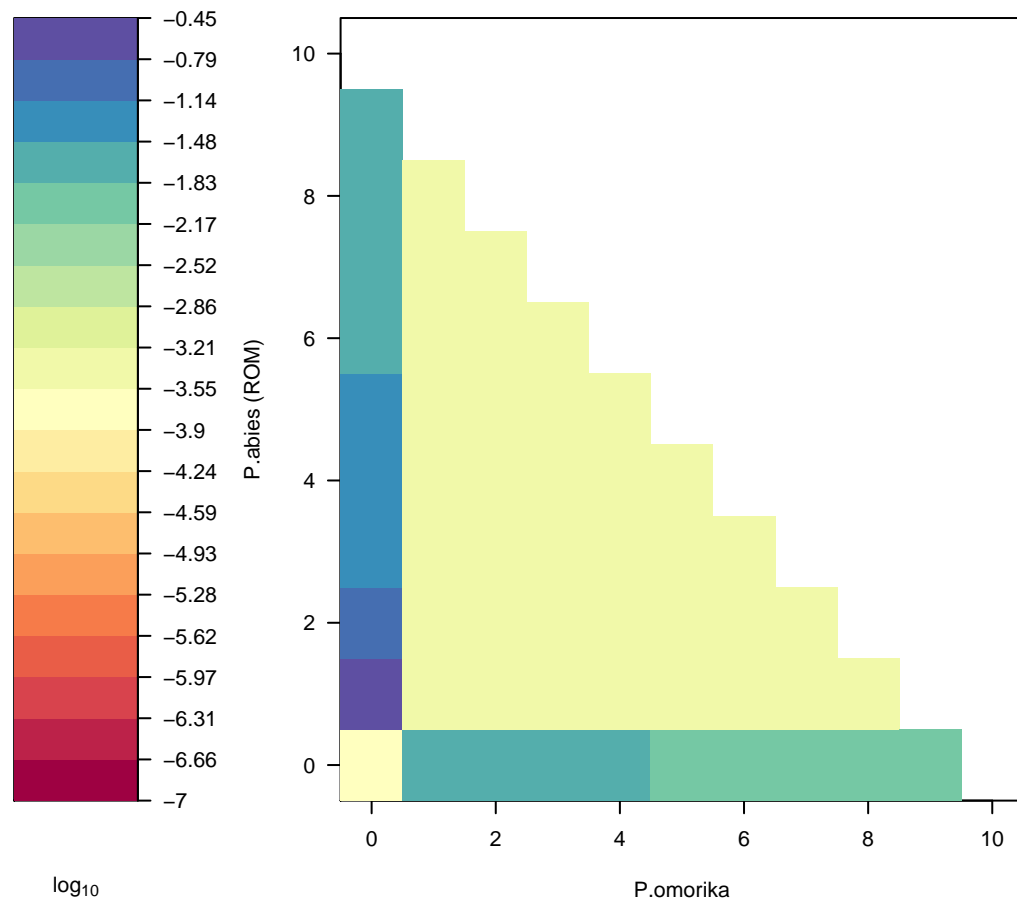**Residual**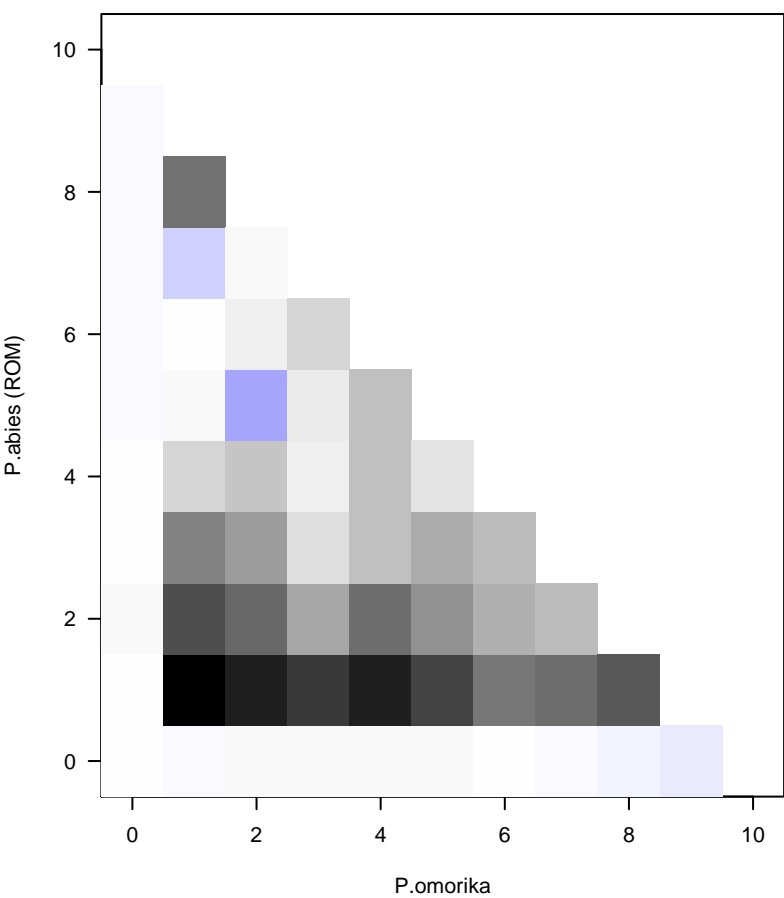**Marginal SFS**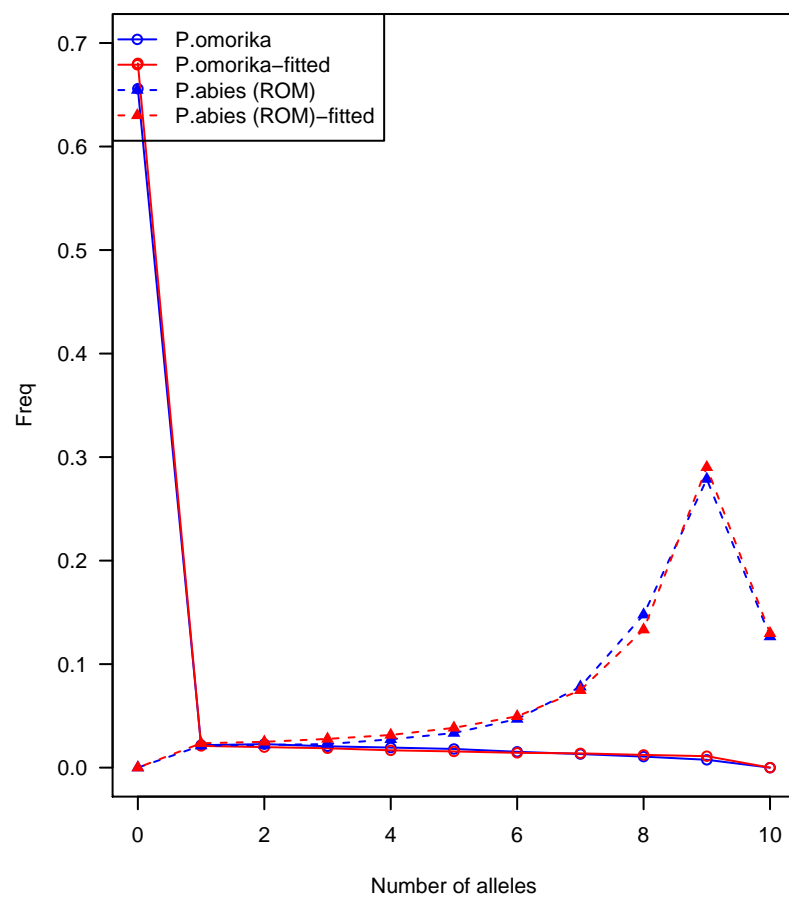

**Observed**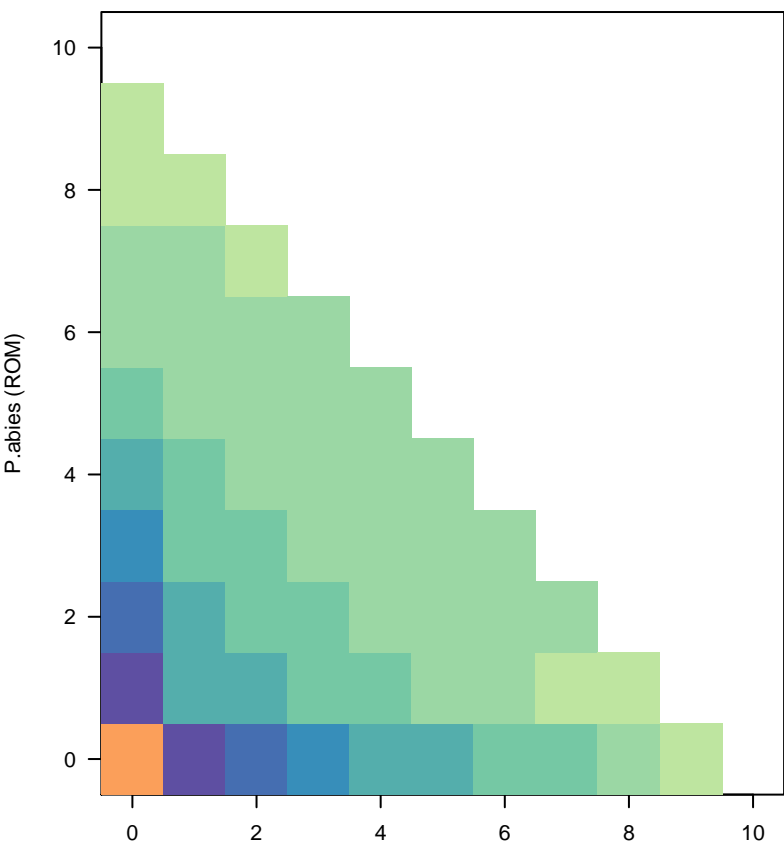**Model**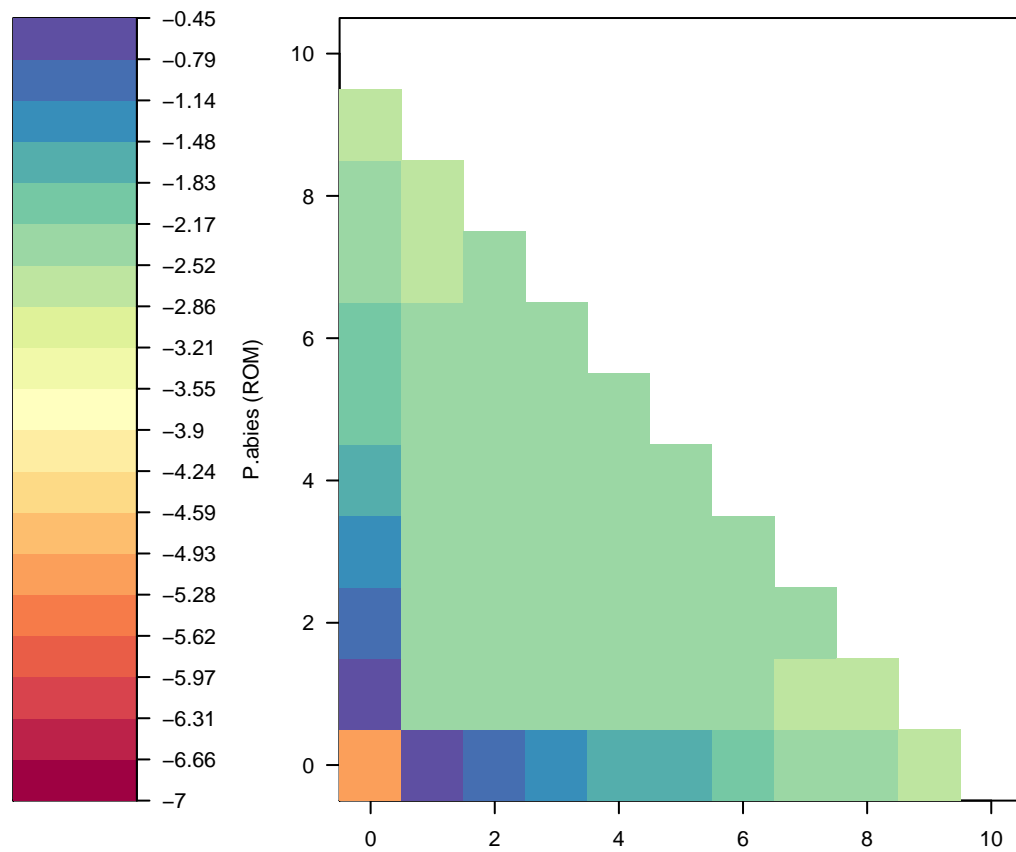**Residual**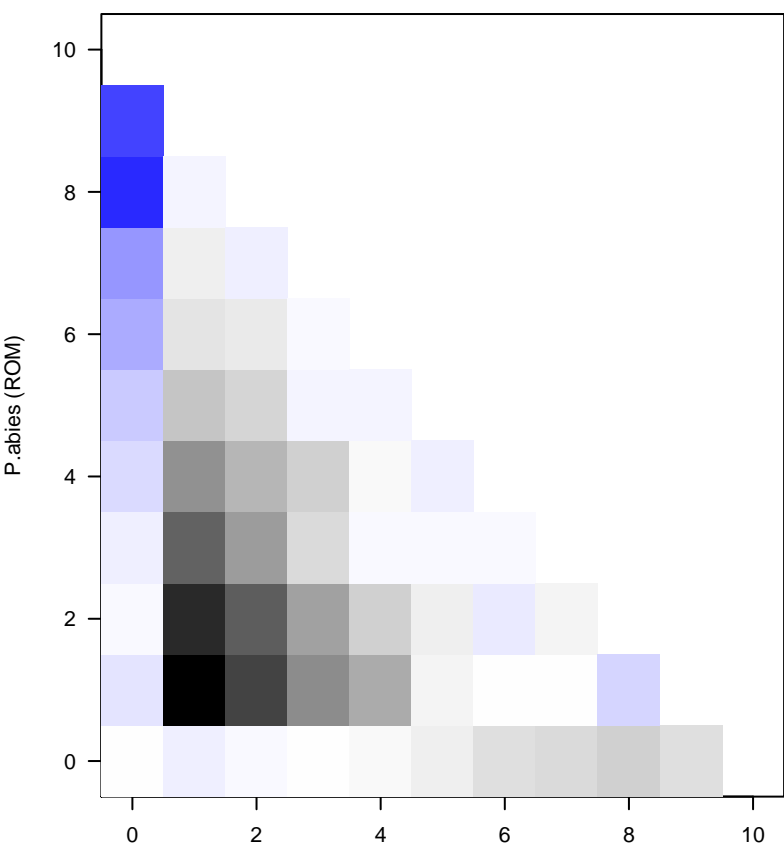log<sub>10</sub>**Marginal SFS**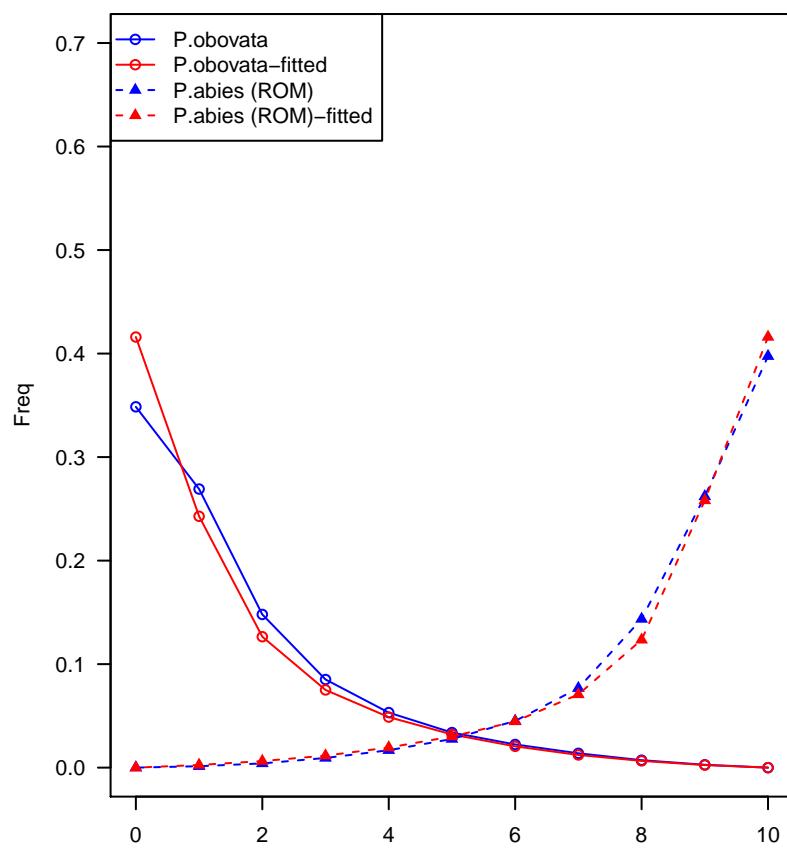

**Observed**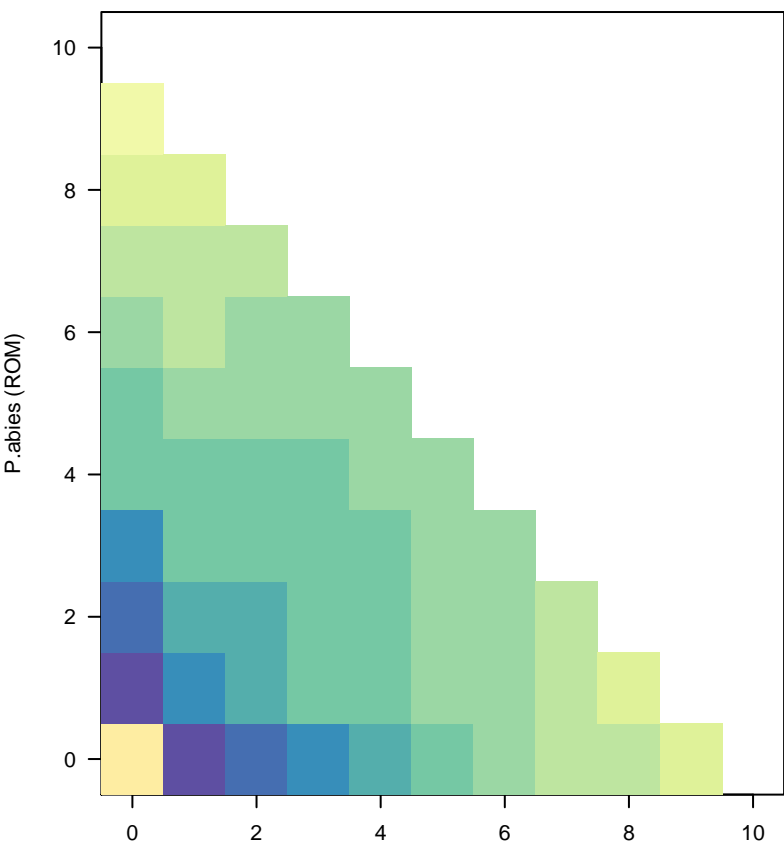

P.abies (FENNO)

**Model**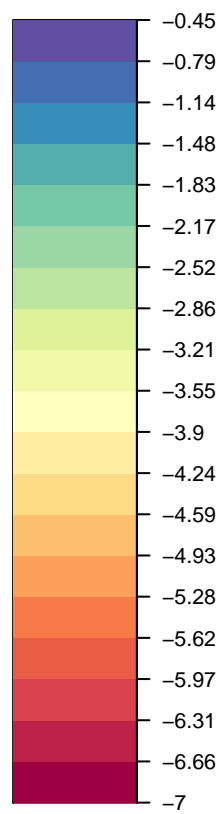 $\log_{10}$ 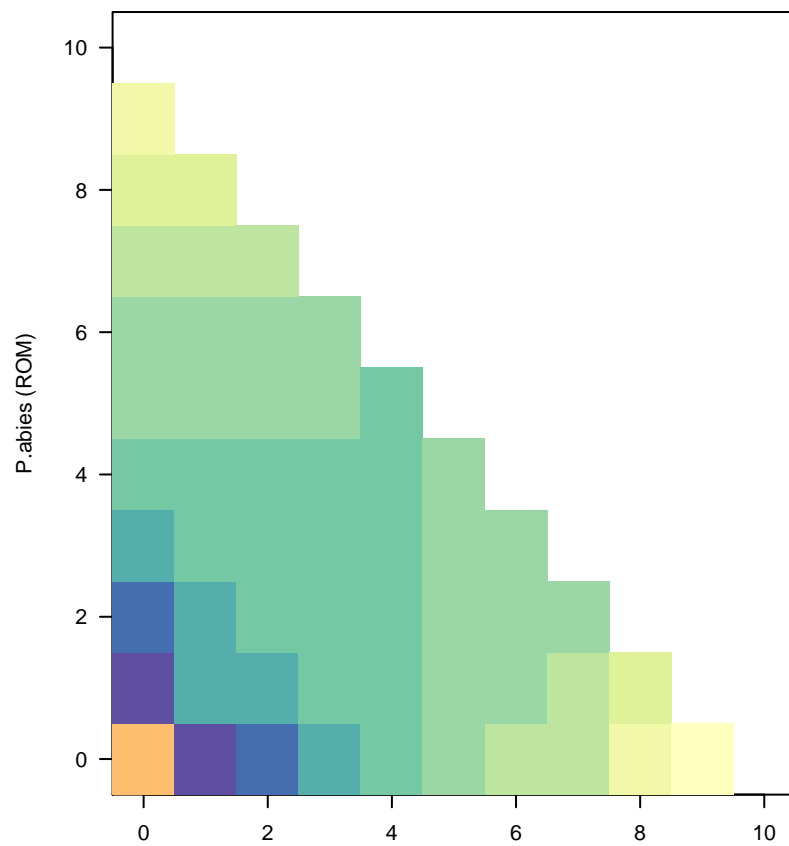

P.abies (FENNO)

**Residual**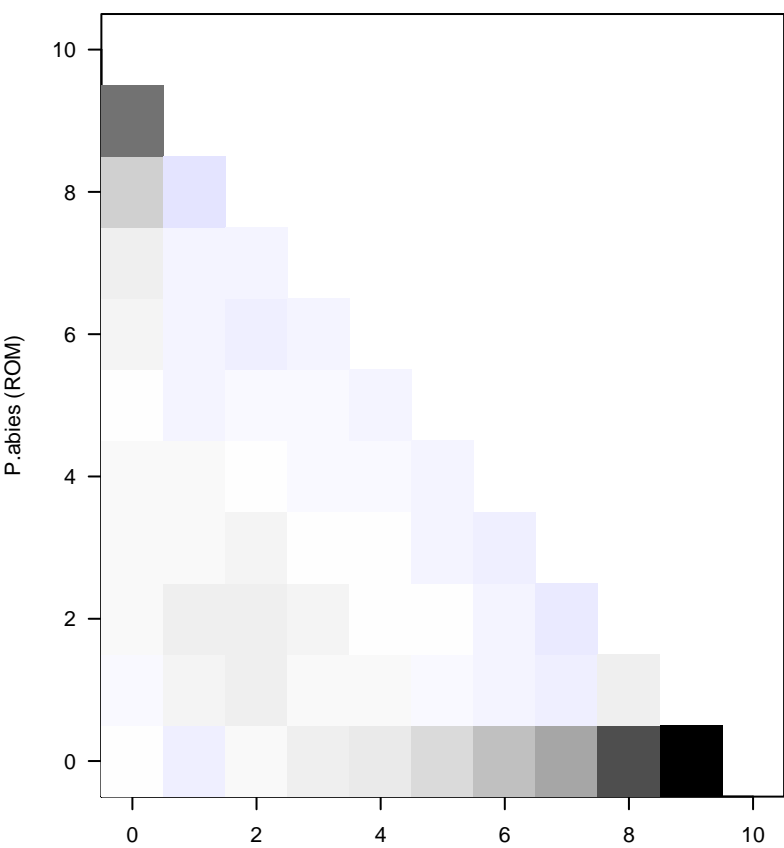

P.abies (FENNO)

**Marginal SFS**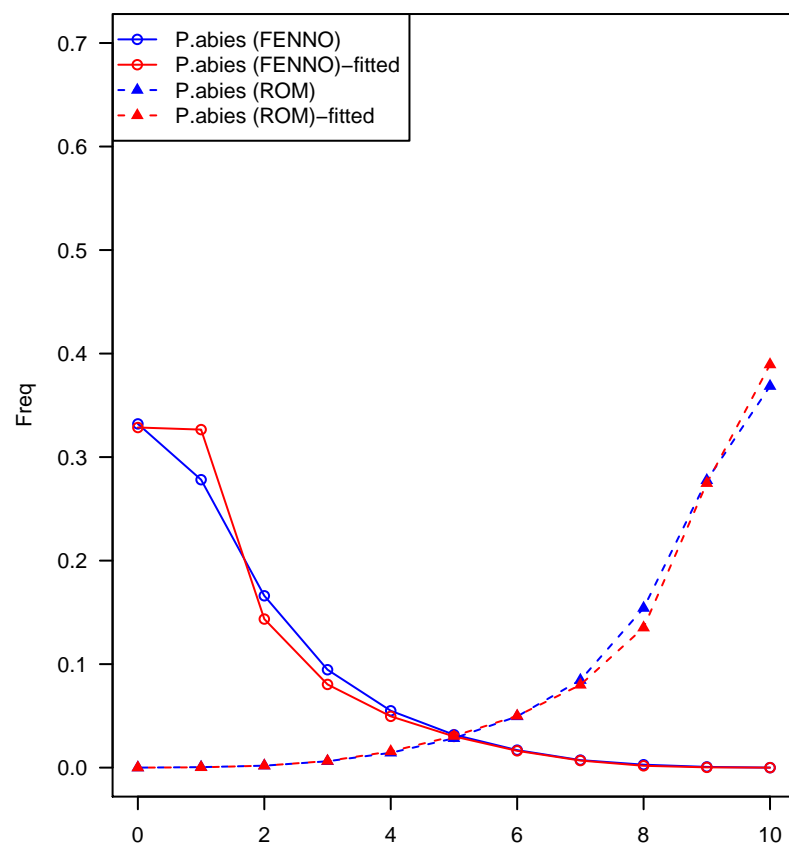

**Observed**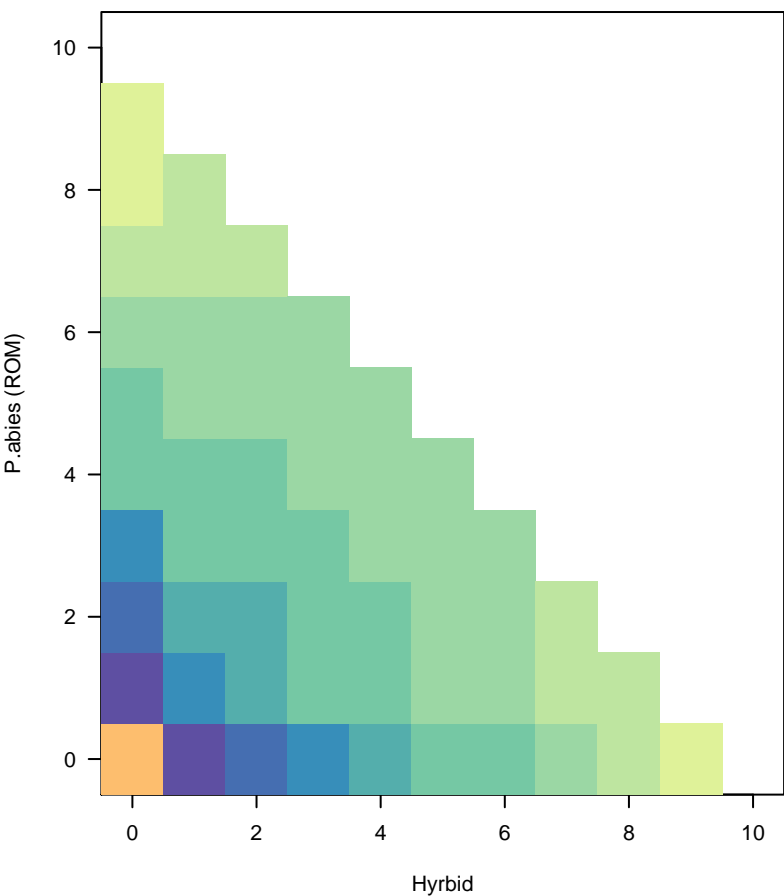**Model**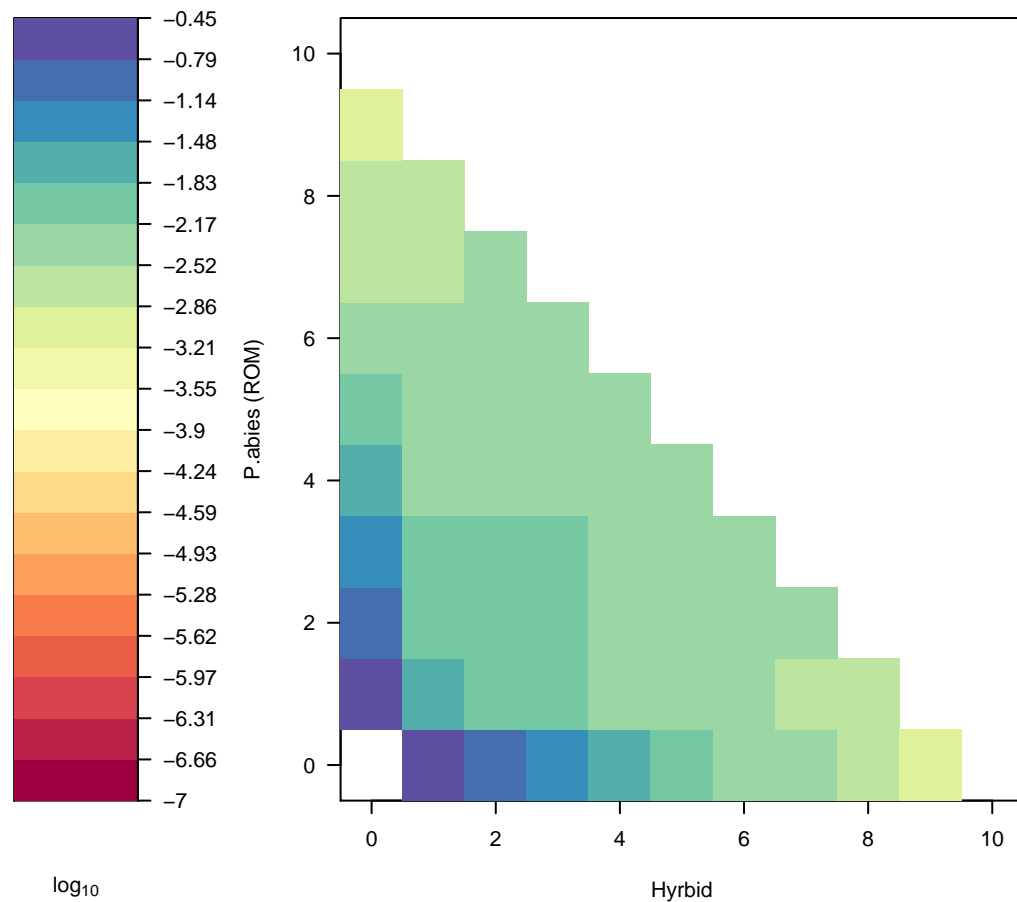**Residual**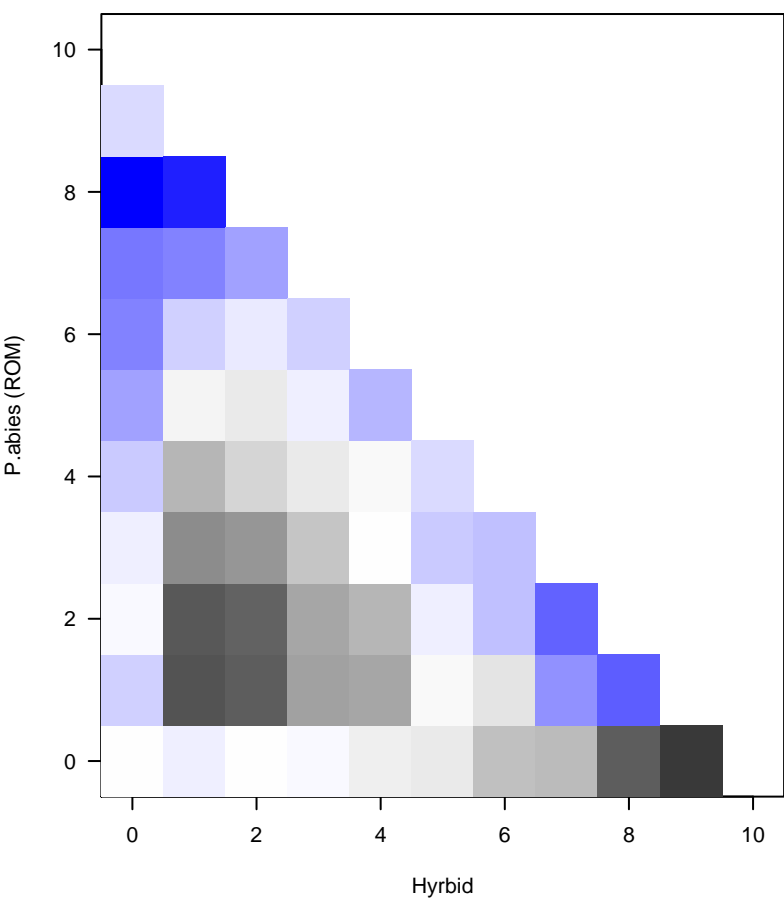**Marginal SFS**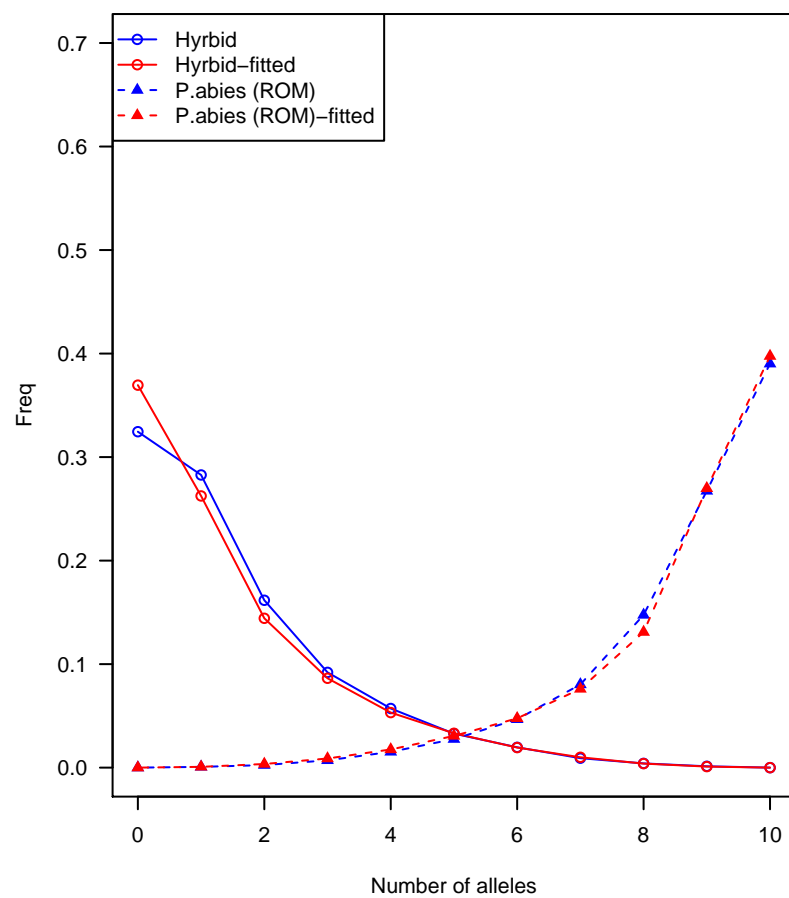

**Observed**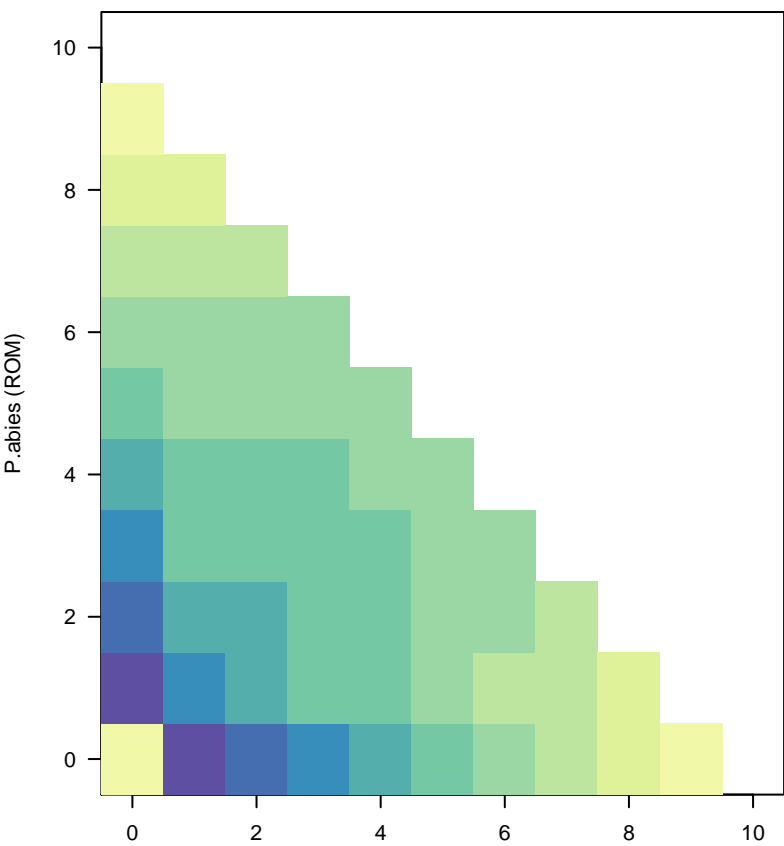

P.abies (ALP)

**Model** $\log_{10}$ 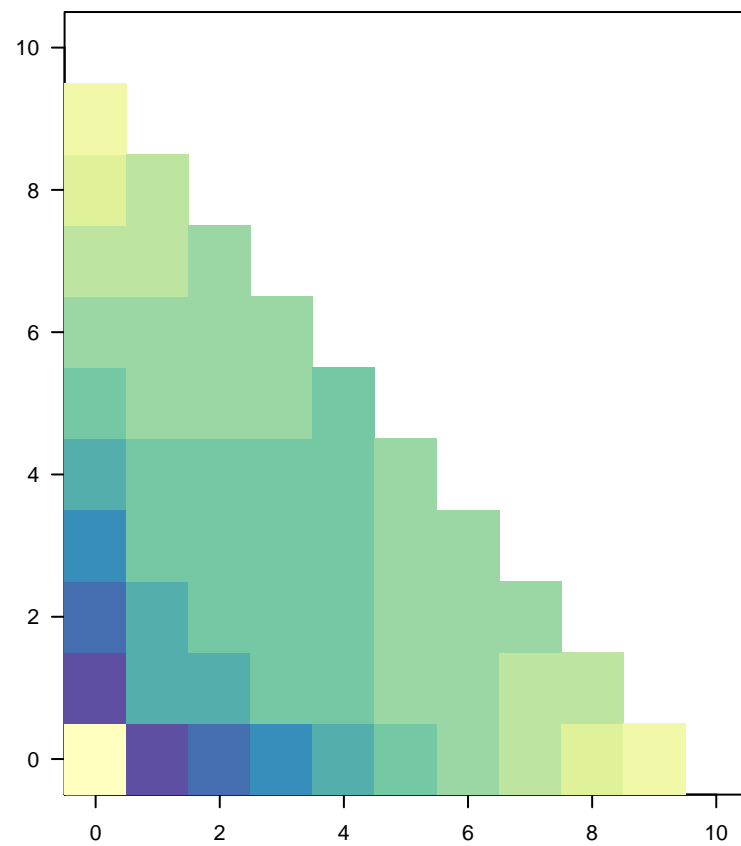

P.abies (ALP)

**Residual**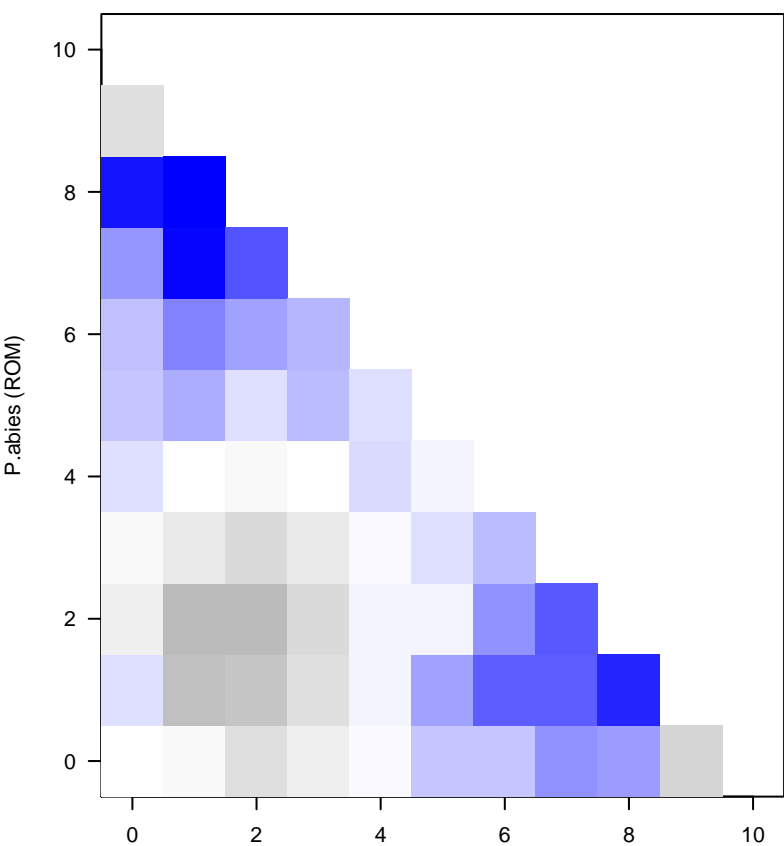

P.abies (ALP)

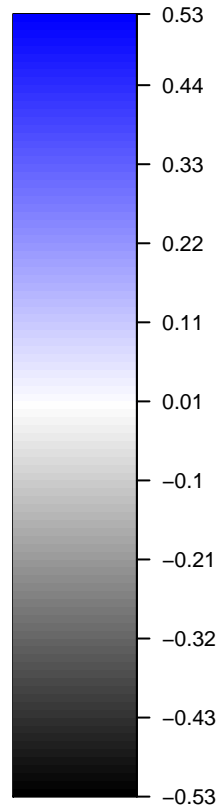**Marginal SFS**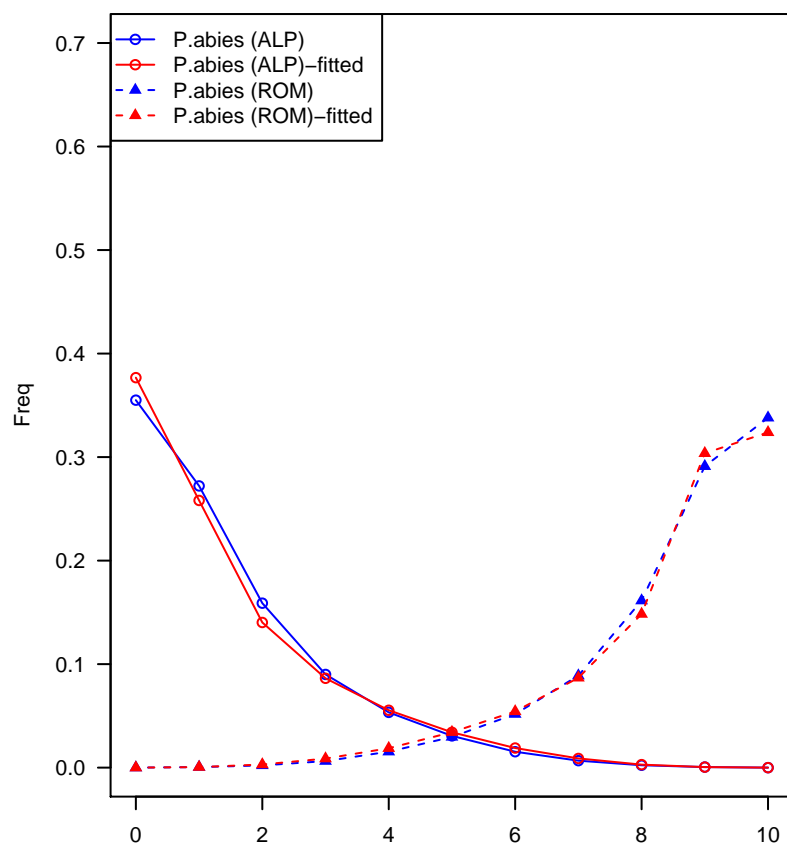

Number of alleles
