# Supplementary material for: Genomic data provide new insights on the demographic history and the extent of recent material transfers in Norway spruce
Source: PubMed Central journal article supplement (PMC6708423; doi:10.1111/eva.12801), 2019-04-30
Supplement: EVA-12-1539-s003.pdf [file EVA-12-1539-s003.pdf]

**Genomic data provides new insights on the demographic  
history and the extent of recent material transfers in  
Norway spruce**

**Supporting Information**

**Table S1: Demographic parameter estimates rescaled by a generation time of 50 years for *P. omorika* (OMO), *P. obovata* (OBO), *P. abies* main domains and *P. abies* – *P. obovata* hybrids (HYB).**

| Parameters            | Point estimation |
|-----------------------|------------------|
| $N_{OMO}$             | 40               |
| $N_{OBO}$             | 17,749           |
| $N_{HYBRID}$          | 200              |
| $N_{ALPINE}$          | 2,991            |
| $N_{CARPATHIAN}$      | 4,022            |
| $N_{FENNOSCANDIAN}$   | 3,770            |
| $T_{OMO\_OBO\_ABIES}$ | 22,875,400       |
| $T_{OBO-ABIES}$       | 17,600,050       |
| $T_{OBO-HYB}$         | 17,597,625       |
| $T_{FAC}$             | 15,274,375       |
| $T_{AC}$              | 15,272,700       |
| $TADM_{OBO-HYB}$      | 103,150          |
| $TADM_{OBO-ABIES}$    | 1,600            |
| $TBOT_{ABIES}$        | 12,850           |
| $TBOT_{OMO}$          | 2,775            |

<sup>a</sup> Fennoscandian split from Alpine and Carpathian

<sup>b</sup> Alpine – Carpathian split

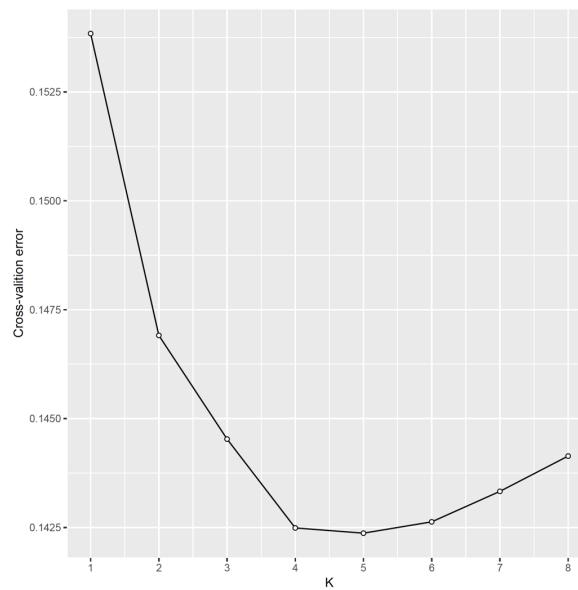

**Figure S1: Cross-validation error regarding number of cluster for unsupervised population clustering.**

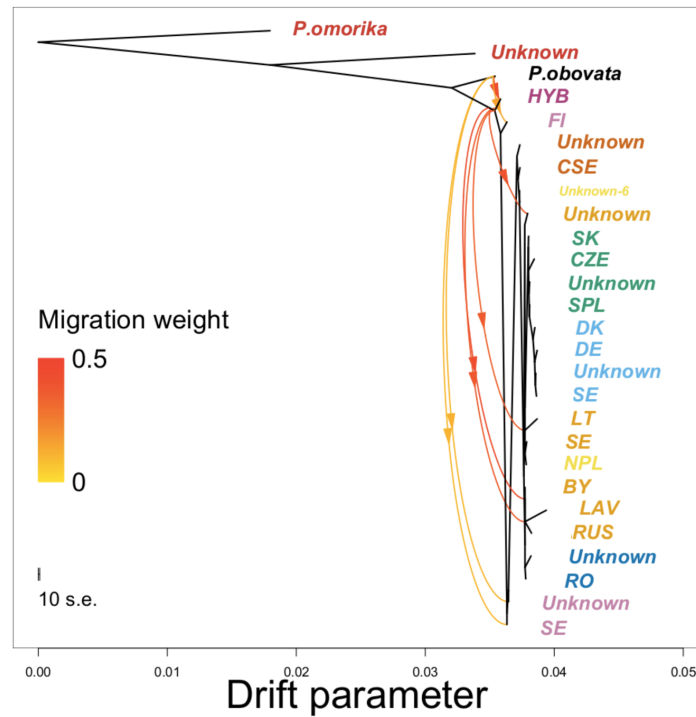

**Figure S2: TreeMix graph with 8 migration events.** Text colors showed the same genetic clusters in (Figure 2a and b). Russian-Baltic: Russia (RU), Belarus (BY), Estonia (EE), Latvia (LV), Lithuania (LT); Alpine: Germany (DE), Switzerland (CH), Denmark (DK), Sweden (SE); Central Europe: Slovakia (SK), Cze-republic (CZ), Southern Poland (SPL); Northern Poland (NPL); Romania (RO); Central Sweden (CSE); Fennoscandia: Finland (FI), Sweden (SE).

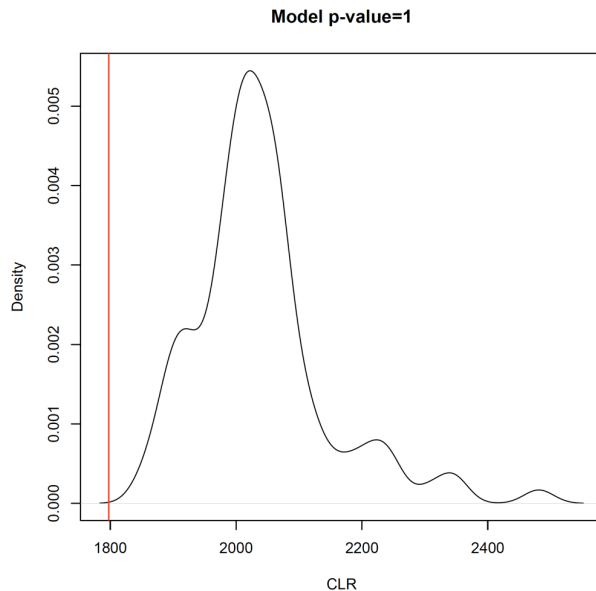

**Figure S3: Likelihood ratio G-statistics distribution.** The likelihood ratio G-statistics ( $CLR = \log_{10}(CL_O/CL_E)$ , where  $CL_O$  and  $CL_E$  are the observed and estimated maximum composite likelihood, respectively) was computed to evaluate model goodness-of-fit. A non-significant  $p$ -value of this test indicates that the observed SFS is well explained by the model. The red dotted line is the CLR of our divergence model.

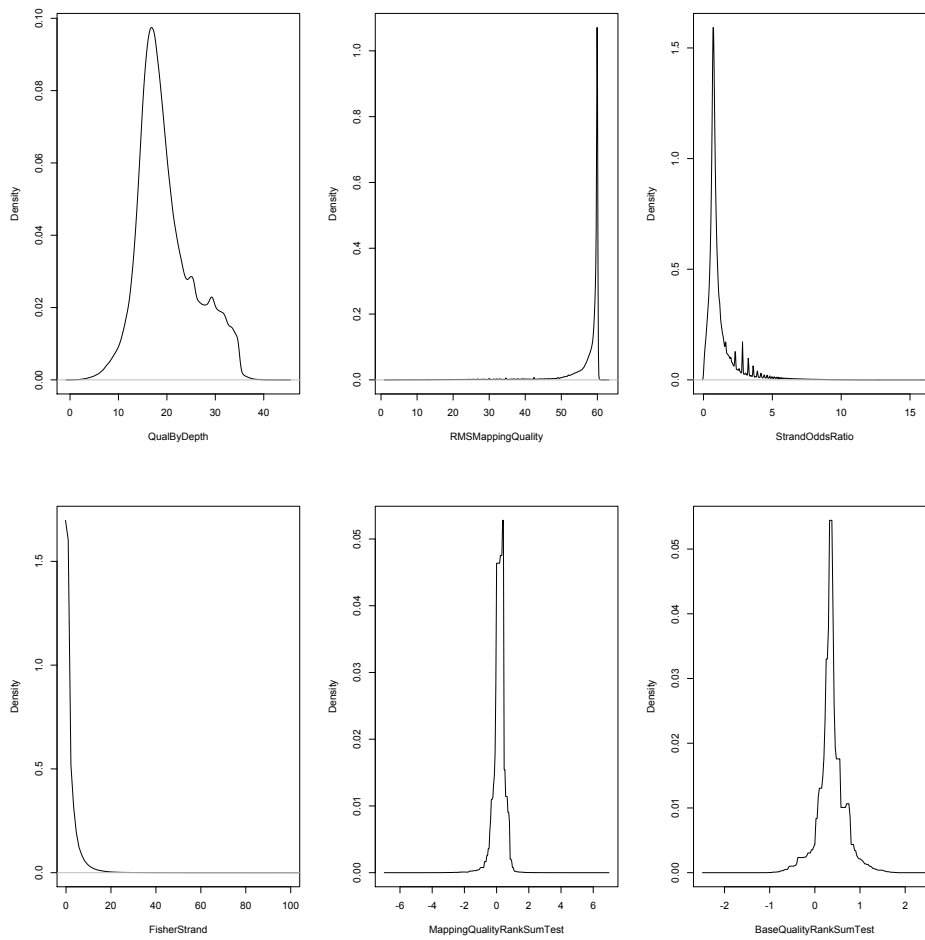

**Figure. S4 Variant quality scores reported for final SNP dataset after VQS using GATK toolkit.** Density distributions of six quality scores (QD, MQ, SOR, FS, MQRankSum, and BaseQRankSum) were plotted to compare with generic recommendations (QD<2; MQ<40; FS>60; SOR > 3; MQRankSum < -12.5) for hard-filtering provided by Broad Institute.
